# Supplementary material for: A New-Generation Internal Tide Model Based on 30 Years of Satellite Sea Surface Height Measurements
Source: Copernicus journal article supplement (doi:10.5194/essd-2024-611), 2025-01-20
Supplement: Supplementary file 1 [file essd-2024-611-supplement.pdf]

# **A New-Generation Internal Tide Model Based on 30 Years of Satellite Sea Surface Height Measurements**

Zhongxiang Zhao <sup>1,2</sup>

<sup>1</sup> *Applied Physics Laboratory, University of Washington, Seattle, Washington, USA*

<sup>2</sup> *School of Oceanography, University of Washington, Seattle, Washington, USA*

*Corresponding author: Zhongxiang Zhao, [zzhao@uw.edu](mailto:zzhao@uw.edu)*

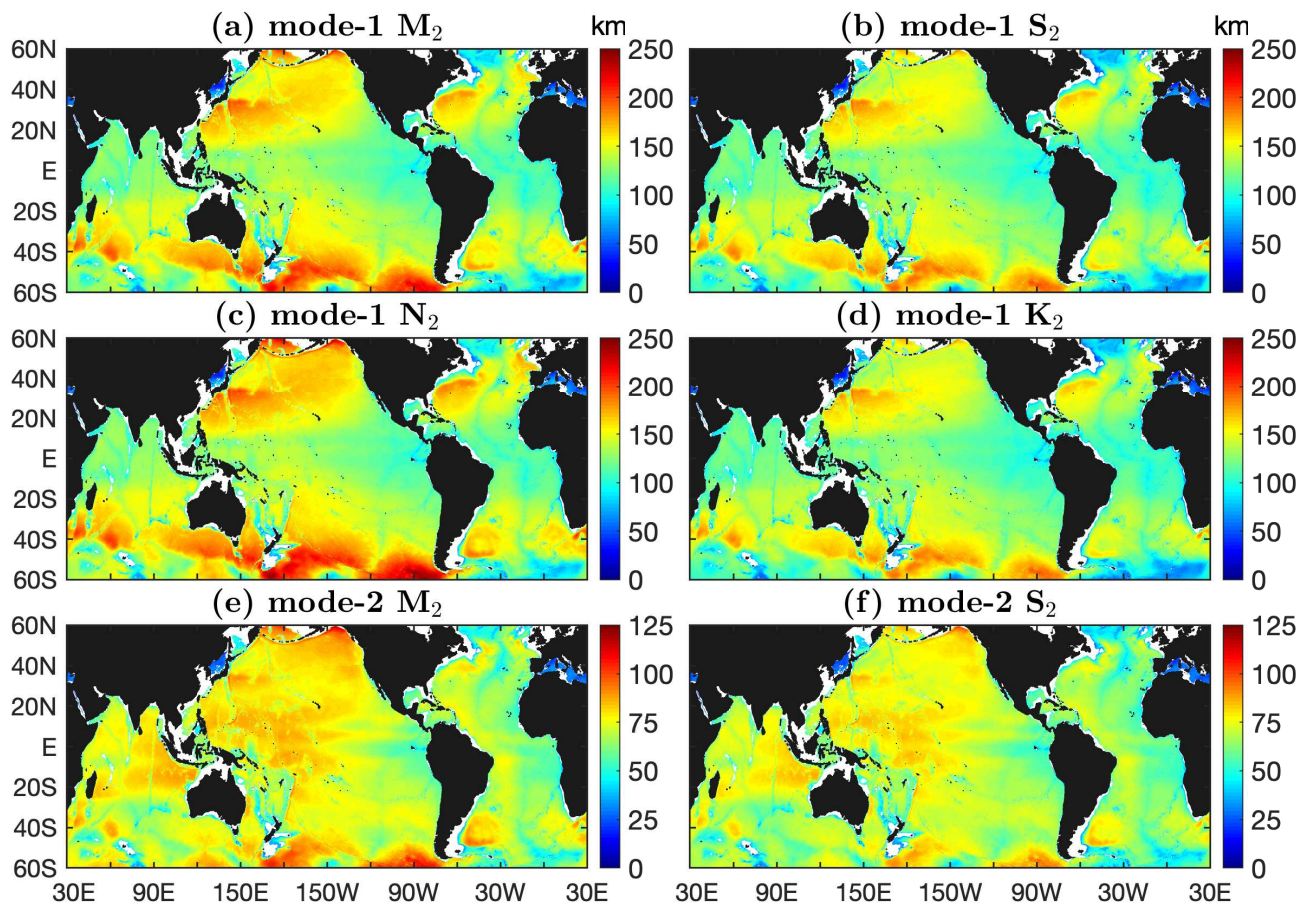

**Figure S1.** Wavelengths of semidiurnal internal tides obtained by solving the Sturm-Liouville orthogonal problem using the climatological annual-mean hydrographic profiles in the World Ocean Atlas 2018 and the dispersion relation of linear internal gravity waves with Earth's rotation.

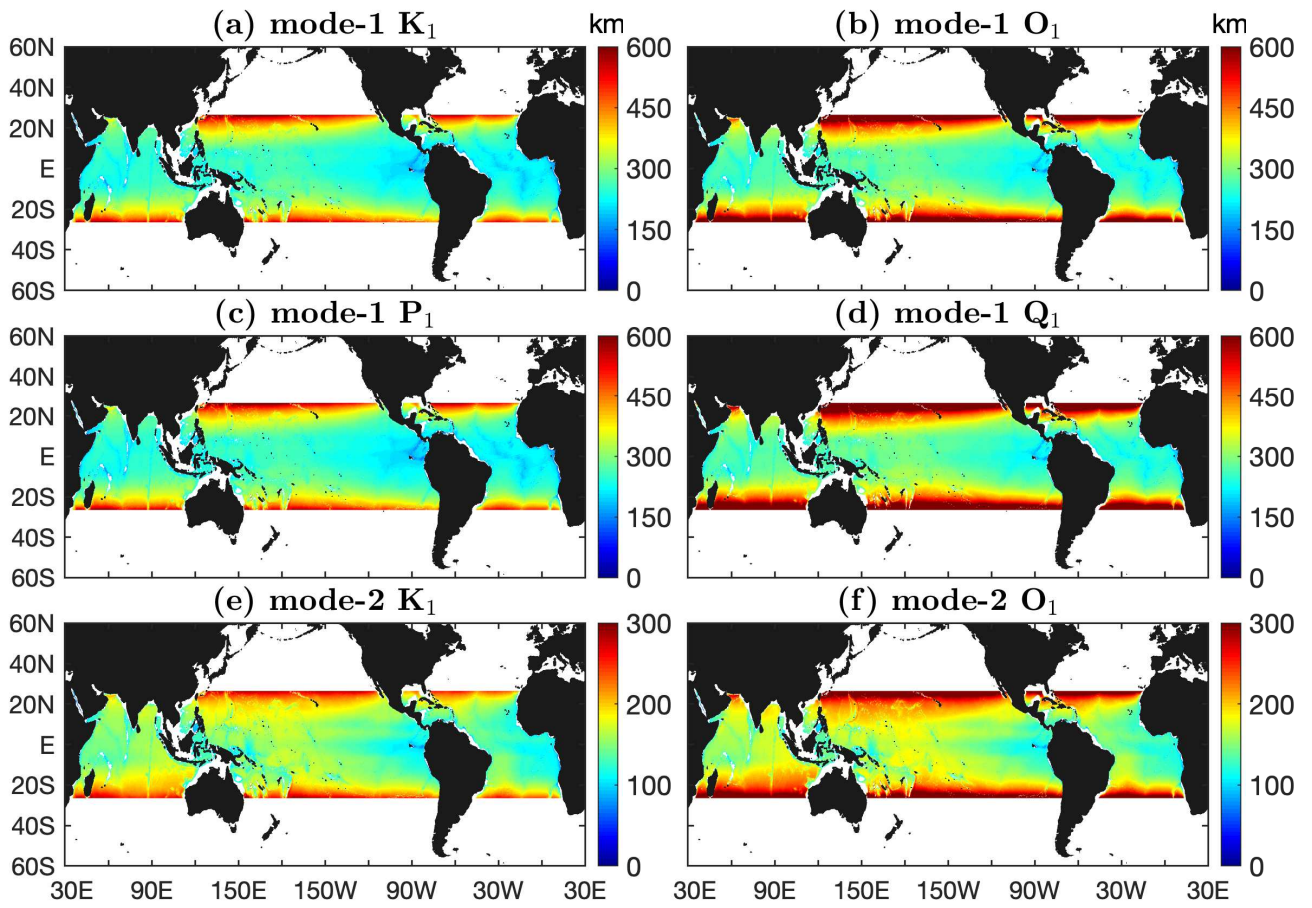

**Figure S2.** As in Figure S1 but for diurnal internal tides.



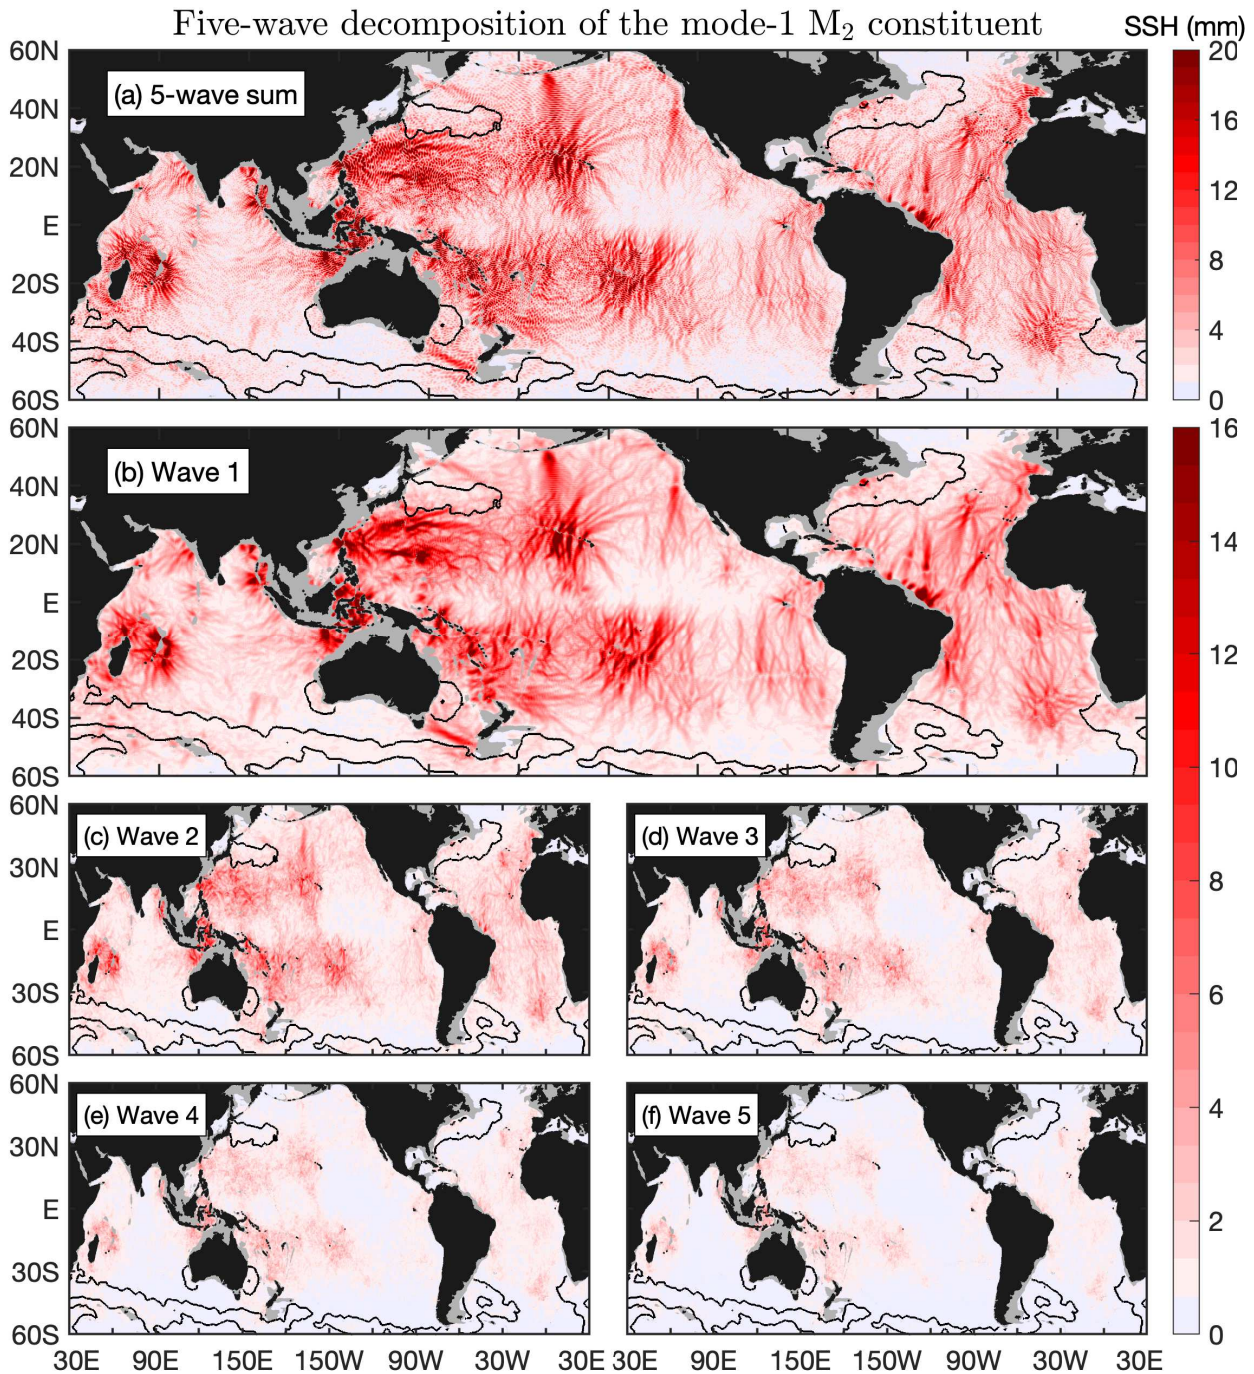

**Figure S3.** Five-wave decomposition of the mode-1  $M_2$  internal tide constituent. (a) The 5-wave sum. (b)-(f) The 5 waves. At each grid point, five mode-1  $M_2$  internal tidal waves in arbitrary horizontal directions are determined by plane wave analysis. Black contours indicate regions of large model errors. Panel (b) shows well-defined long-range internal tidal beams associated with notable topographic features.



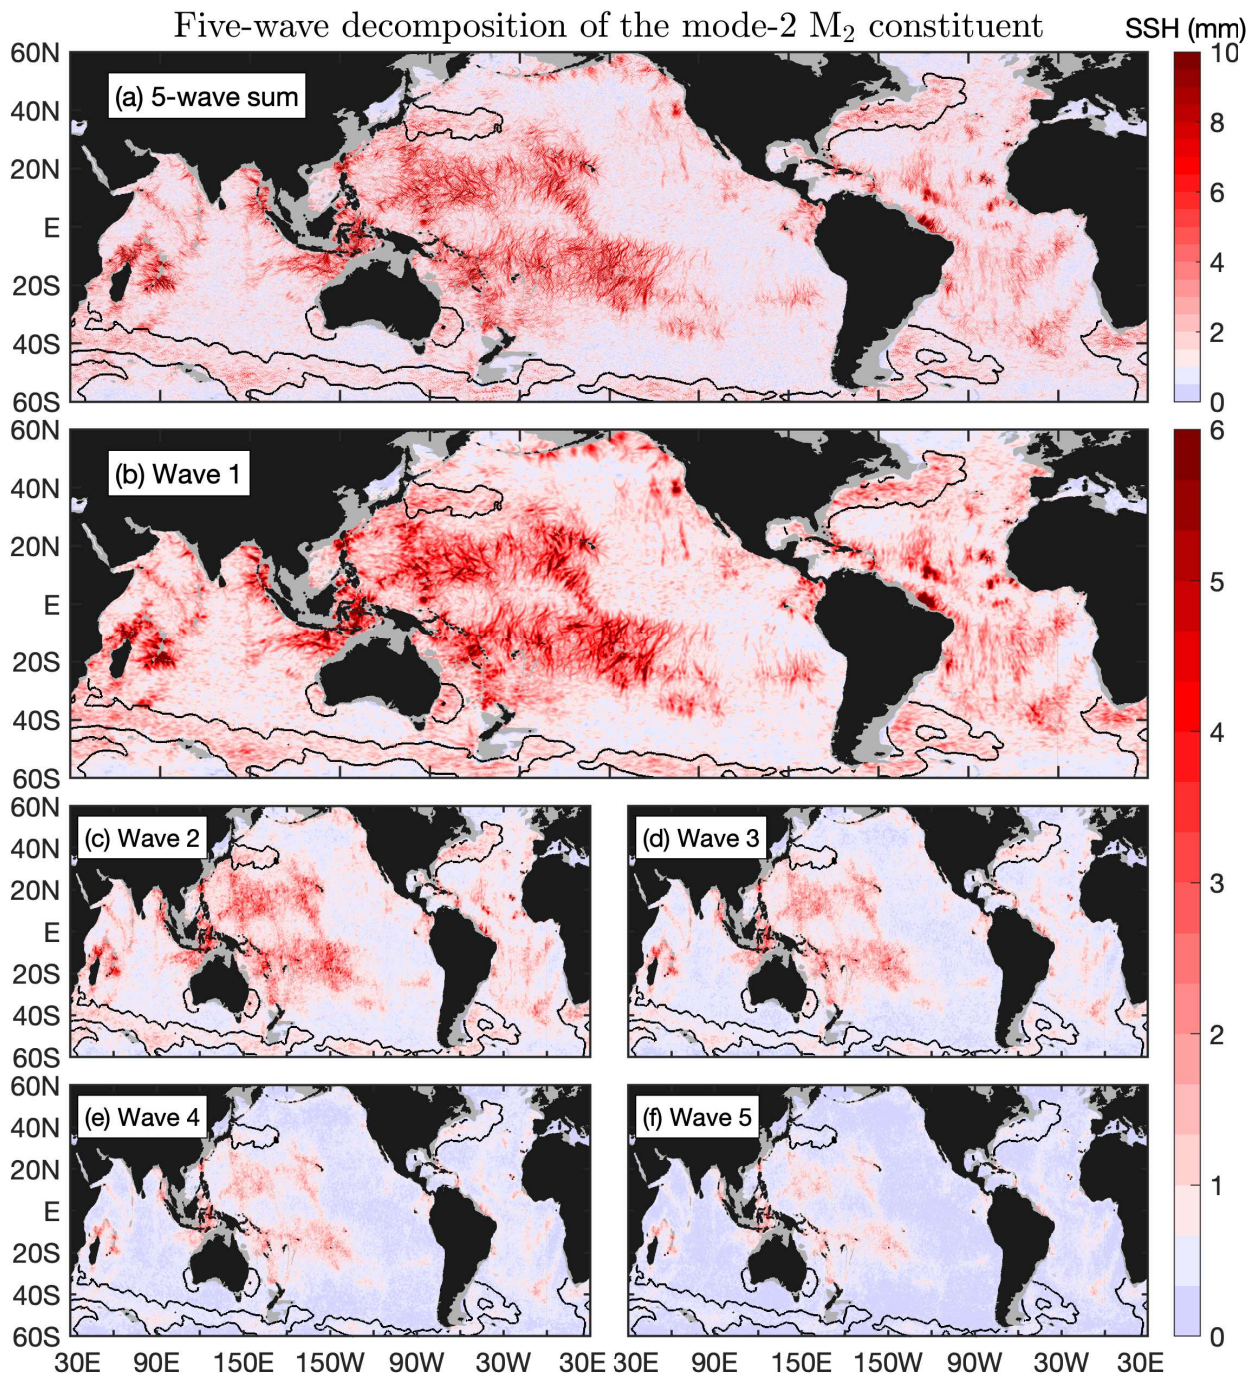

**Figure S4.** As in Figure S3 but for the mode-2  $M_2$  internal tide constituent.



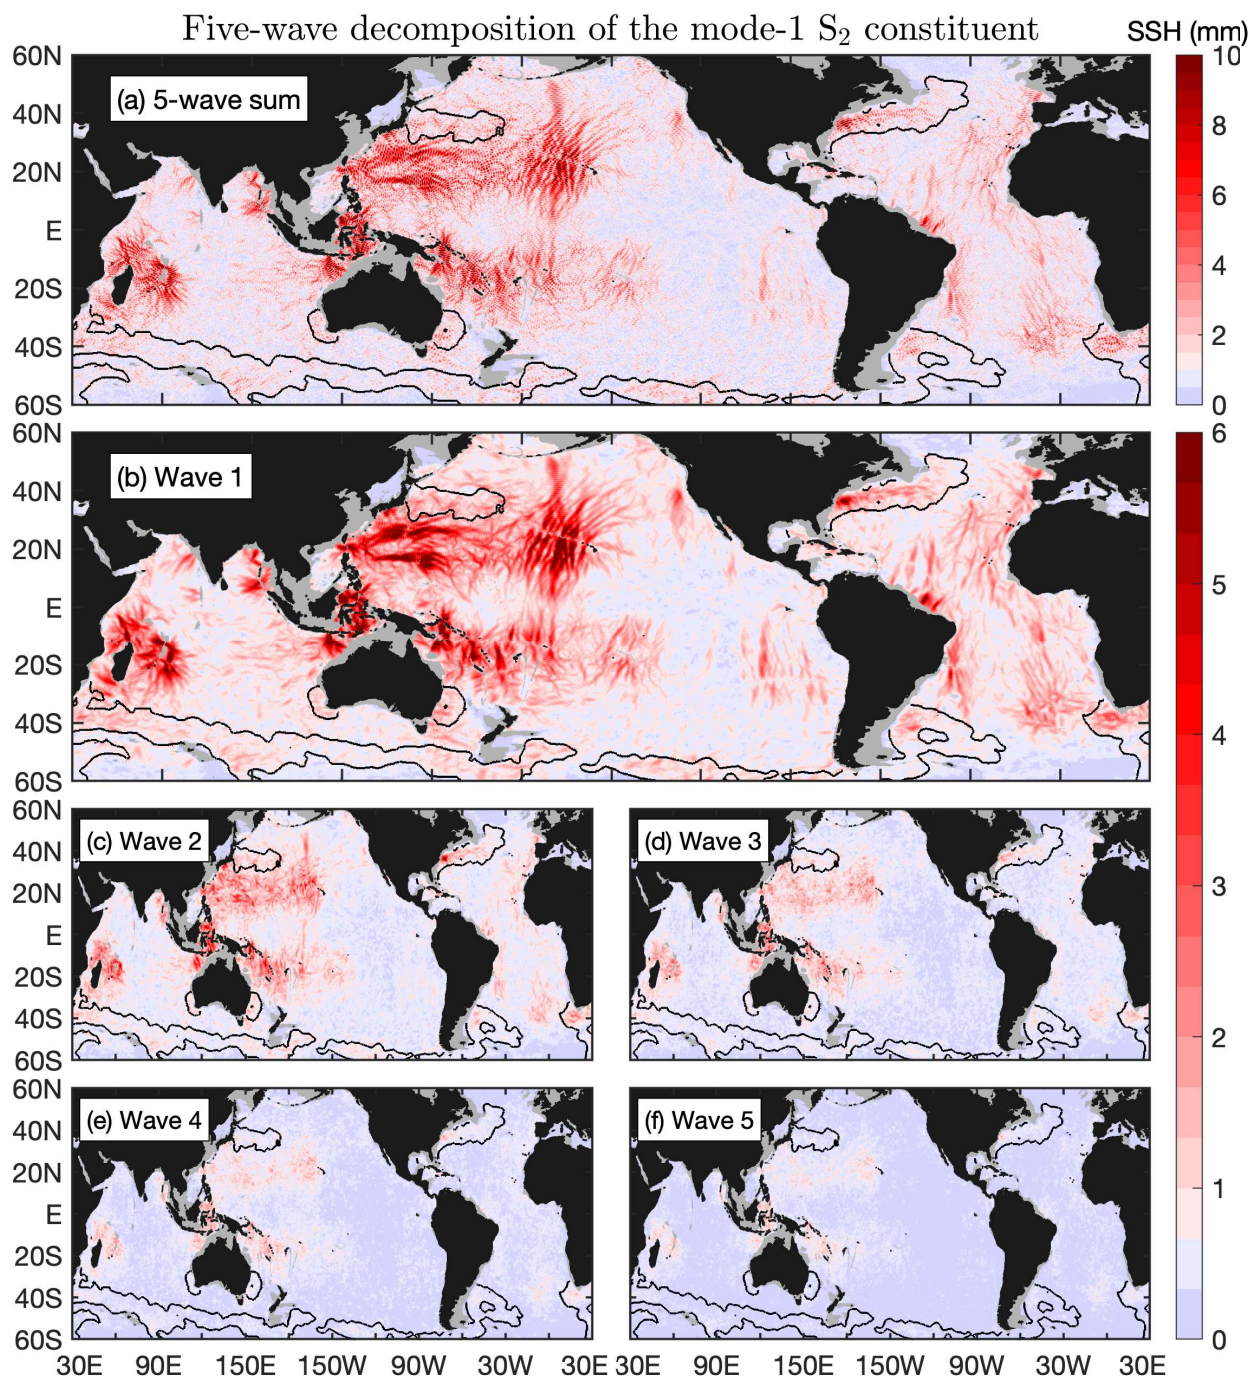

**Figure S5.** As in Figure S3 but for the mode-1  $S_2$  internal tide constituent.



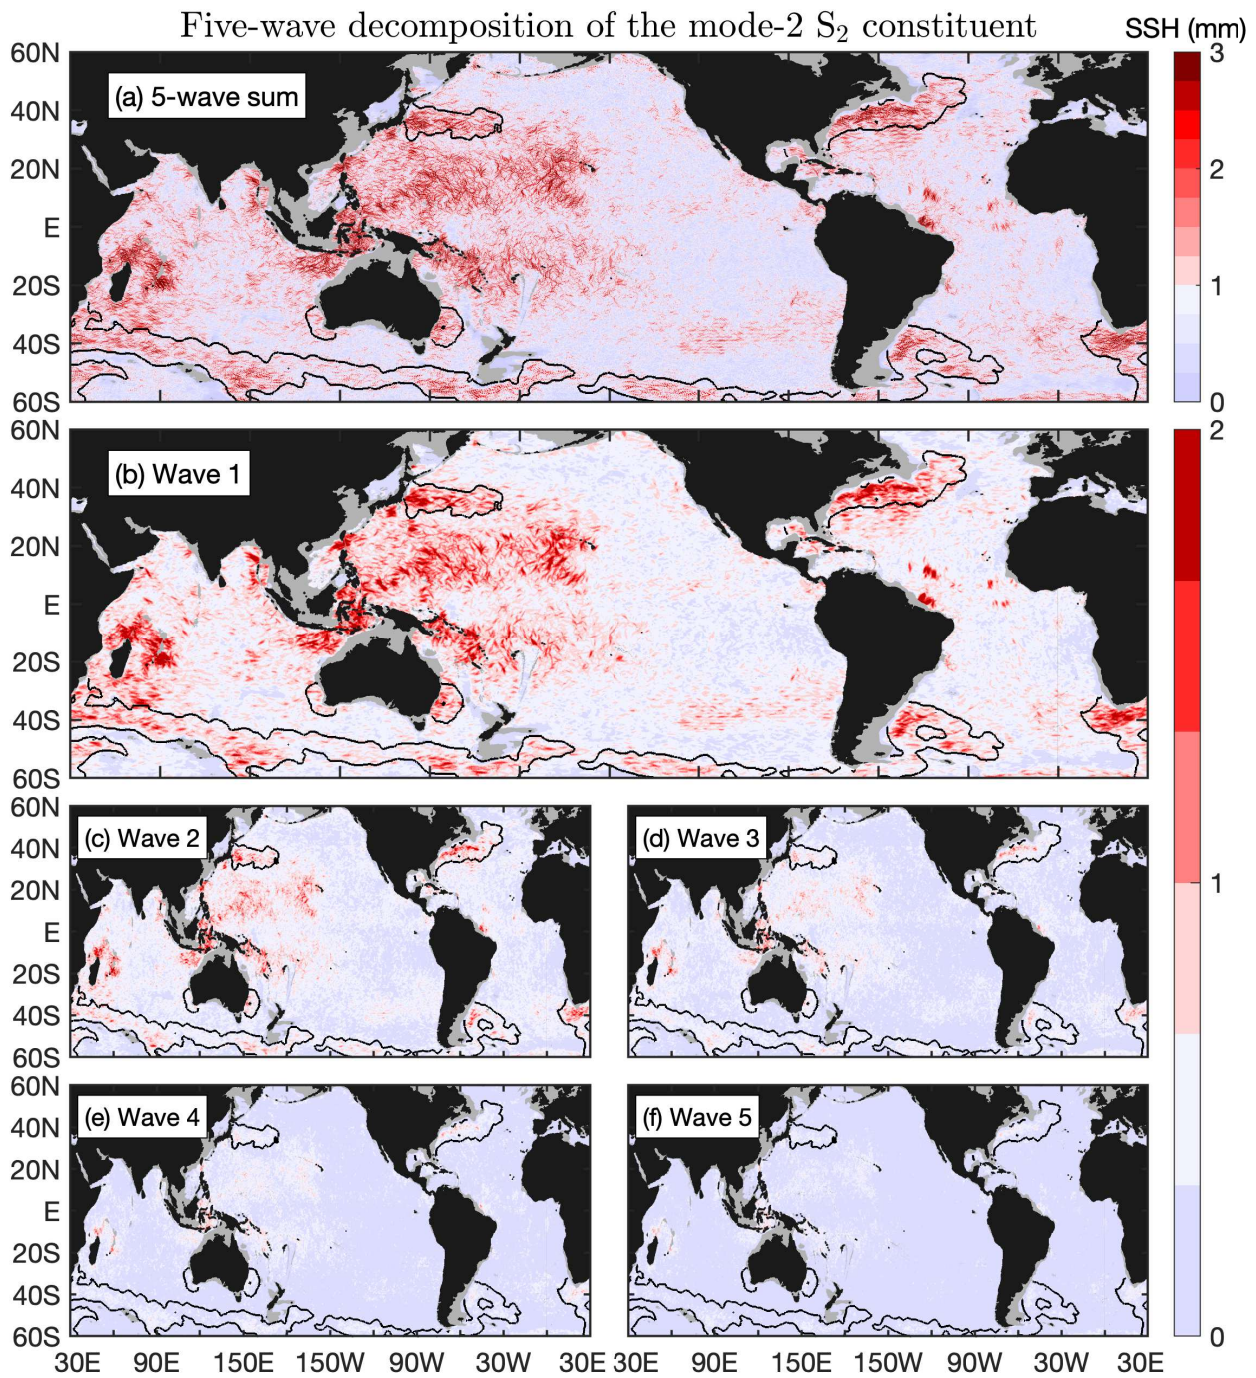

**Figure S6.** As in Figure S4 but for the mode-2  $S_2$  internal tide constituent.



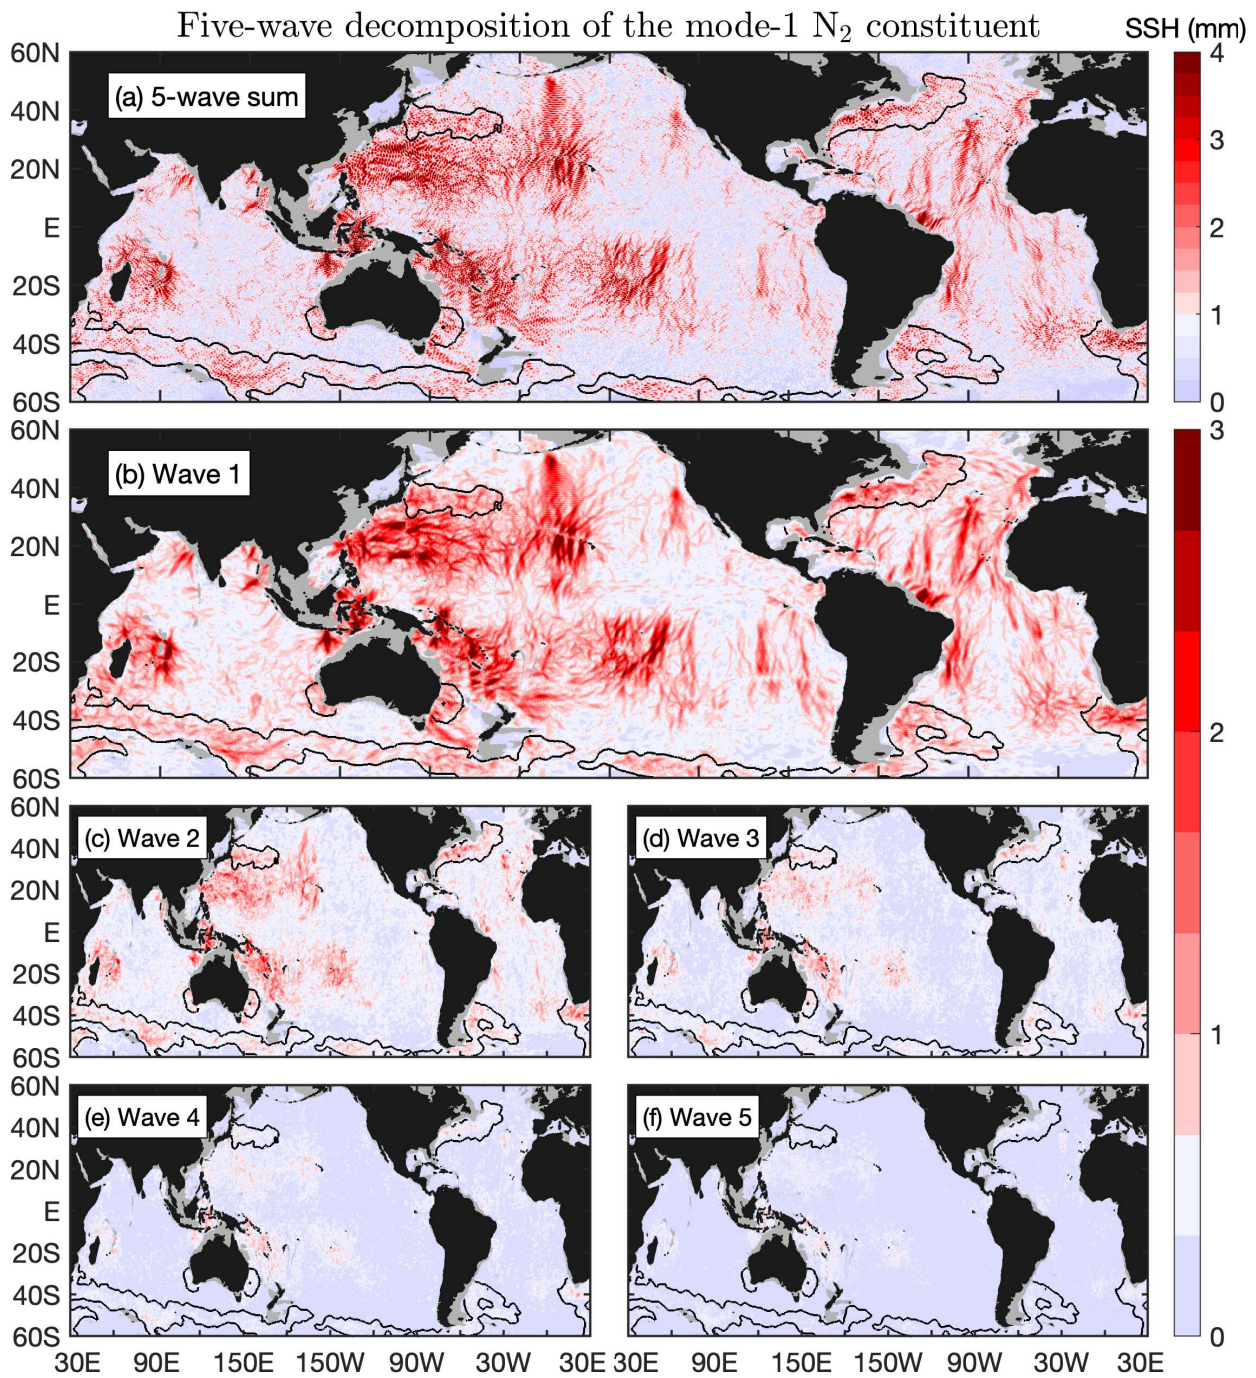

**Figure S7.** As in Figure S3 but for the mode-1  $N_2$  internal tide constituent.



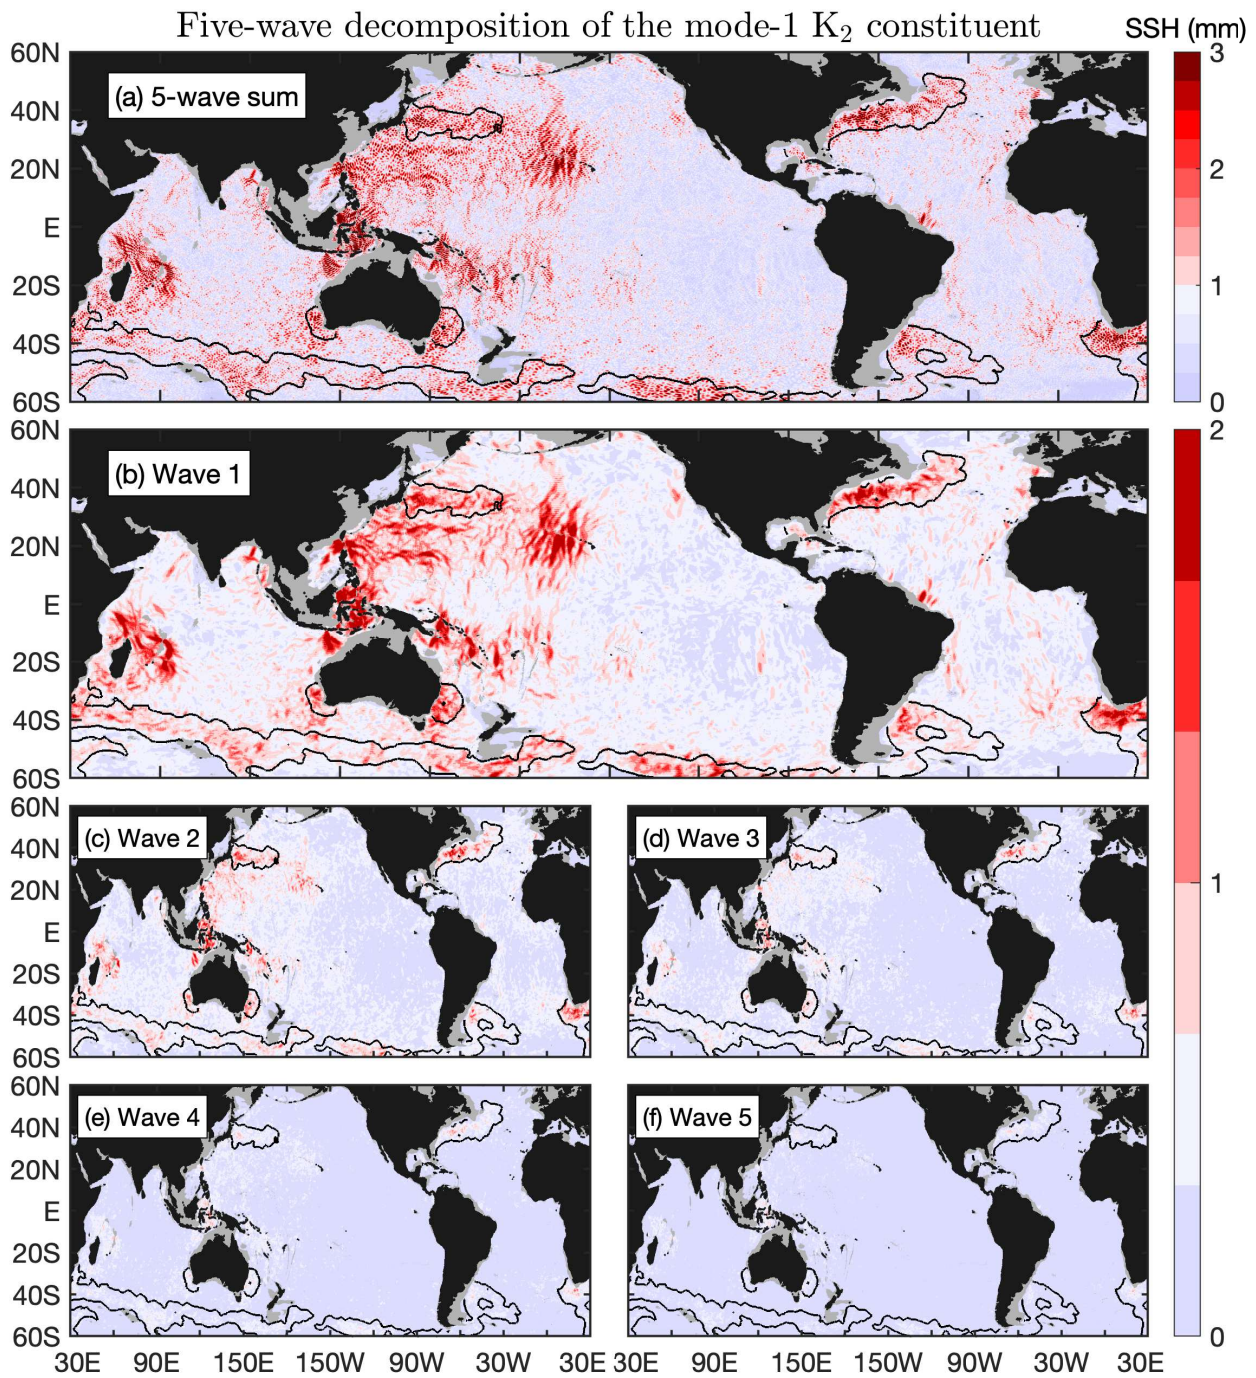

**Figure S8.** As in Figure S3 but for the mode-1  $K_2$  internal tide constituent.

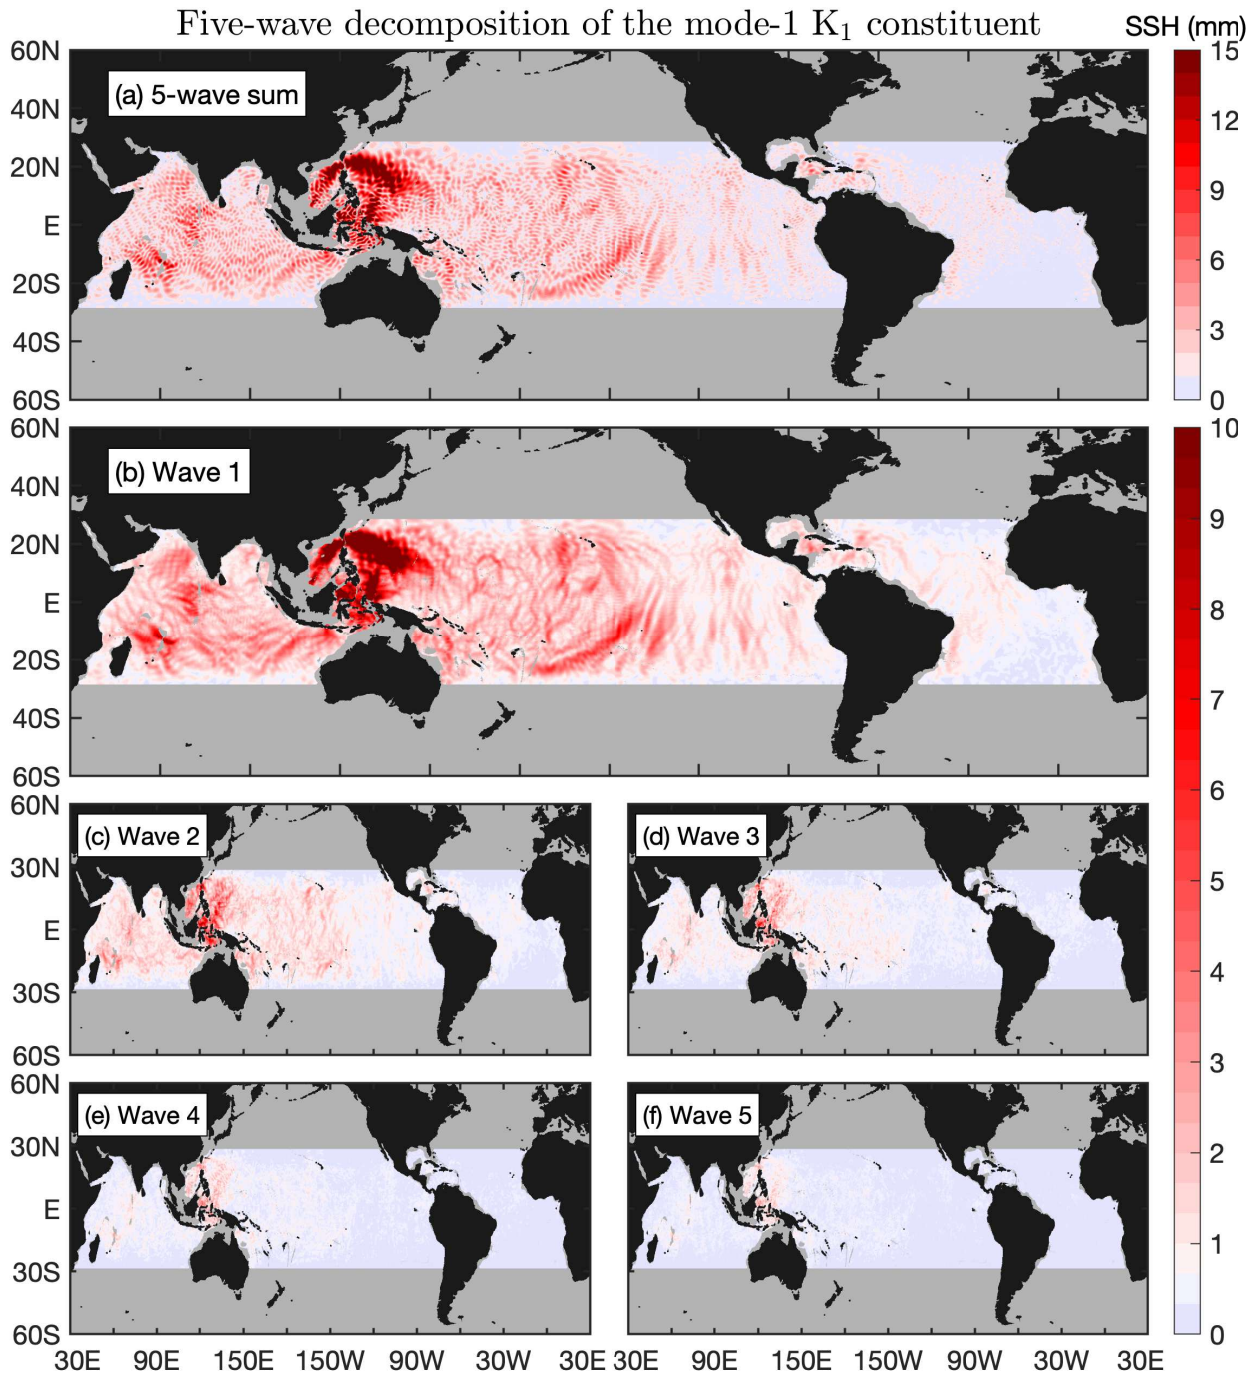

**Figure S9.** Five-wave decomposition of the mode-1  $K_1$  internal tide constituent. (a) The 5-wave sum. (b)-(f) The 5 waves. At each grid point, five mode-1  $K_1$  internal tidal waves in arbitrary horizontal directions are determined by plane wave analysis. Panel (b) shows well-defined long-range internal tidal beams associated with notable topographic features.



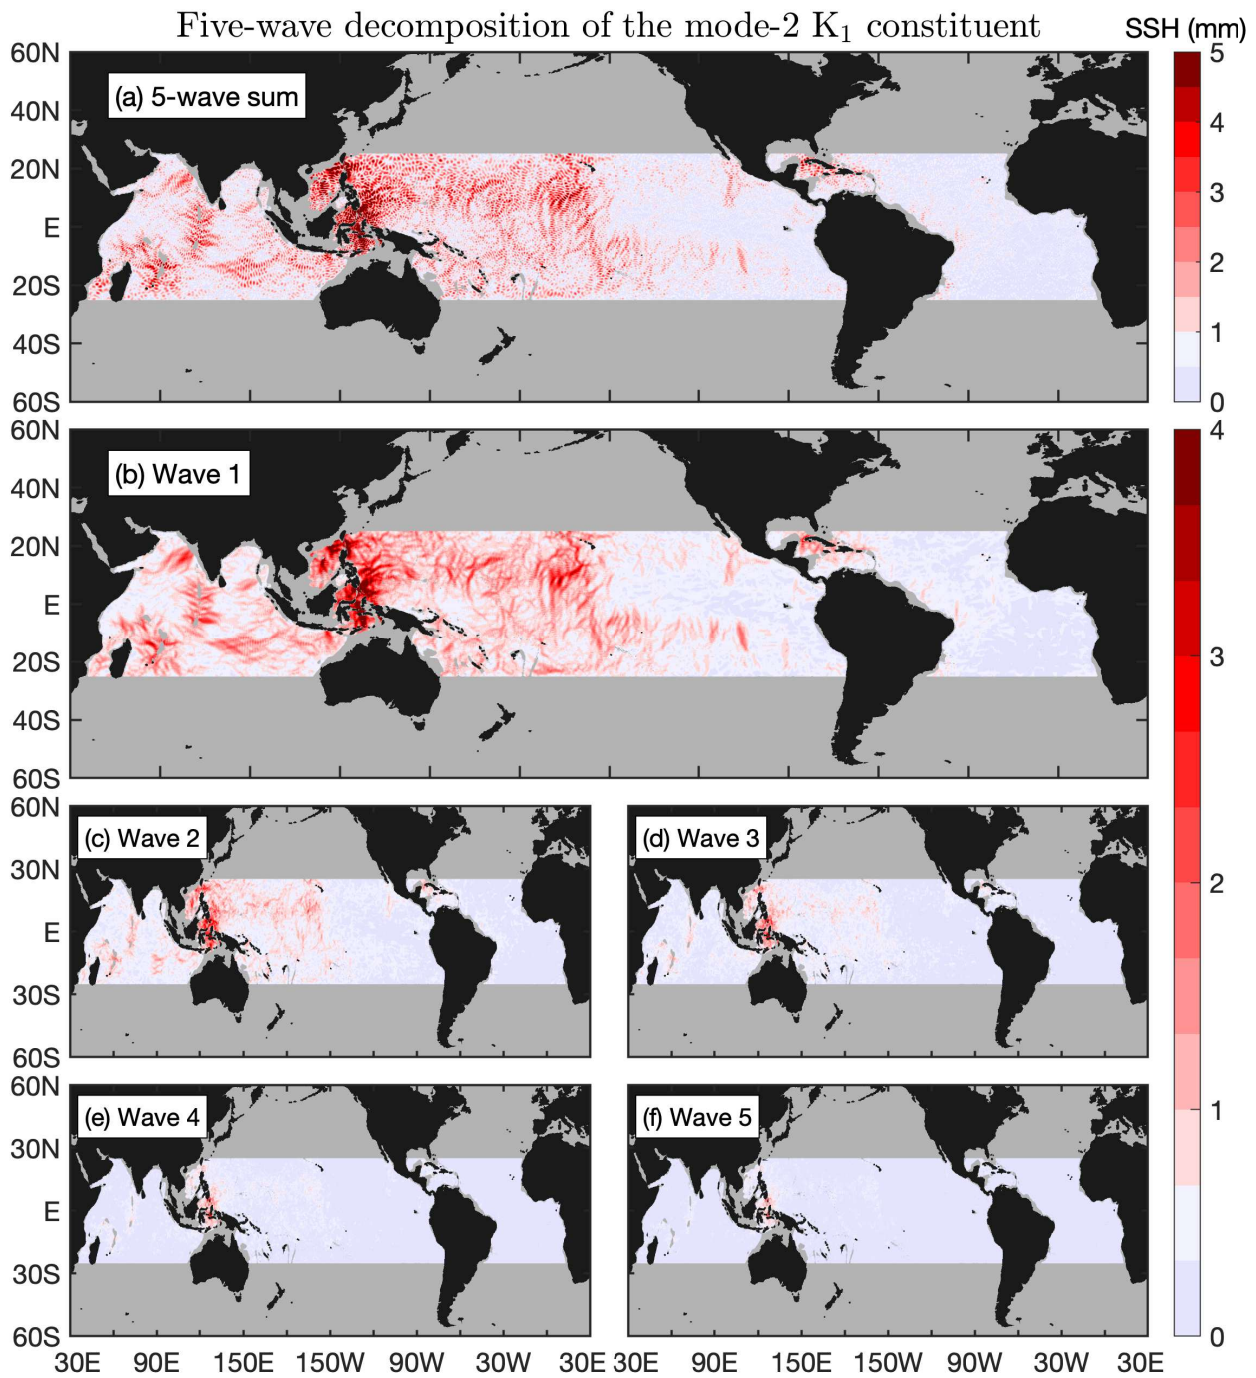

**Figure S10.** As in Figure S9 but for the mode-2  $K_1$  internal tide constituent.

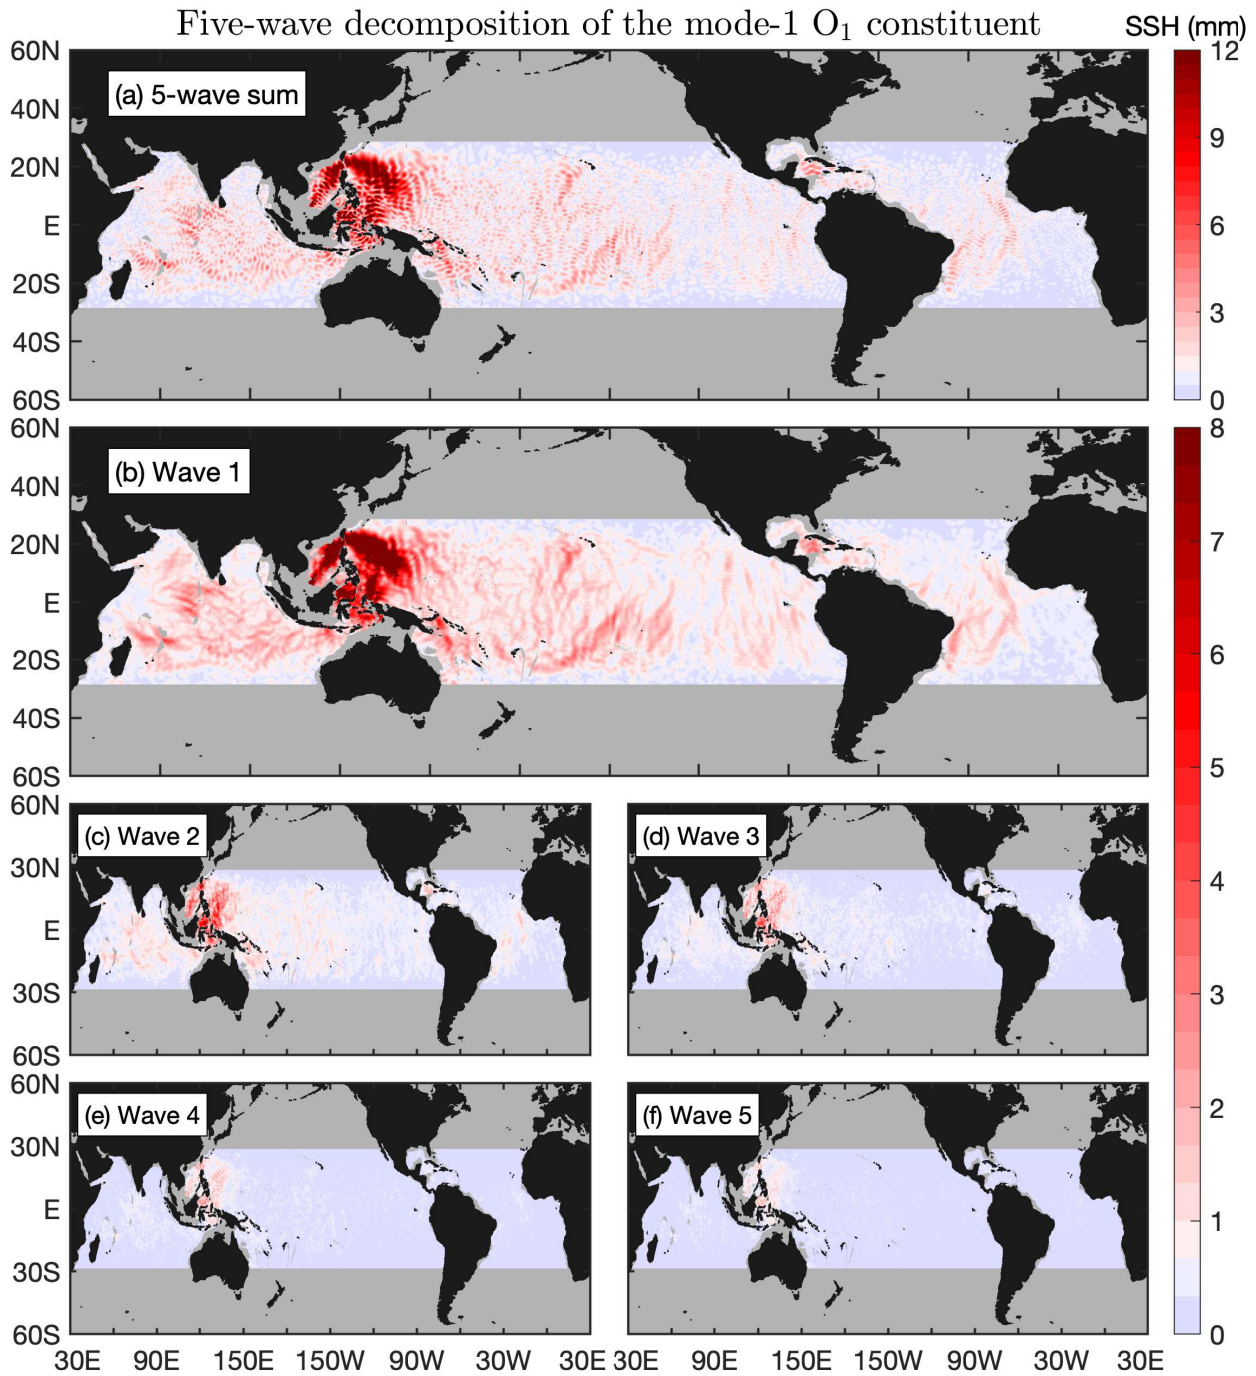

**Figure S11.** As in Figure S9 but for the mode-1  $O_1$  internal tide constituent.

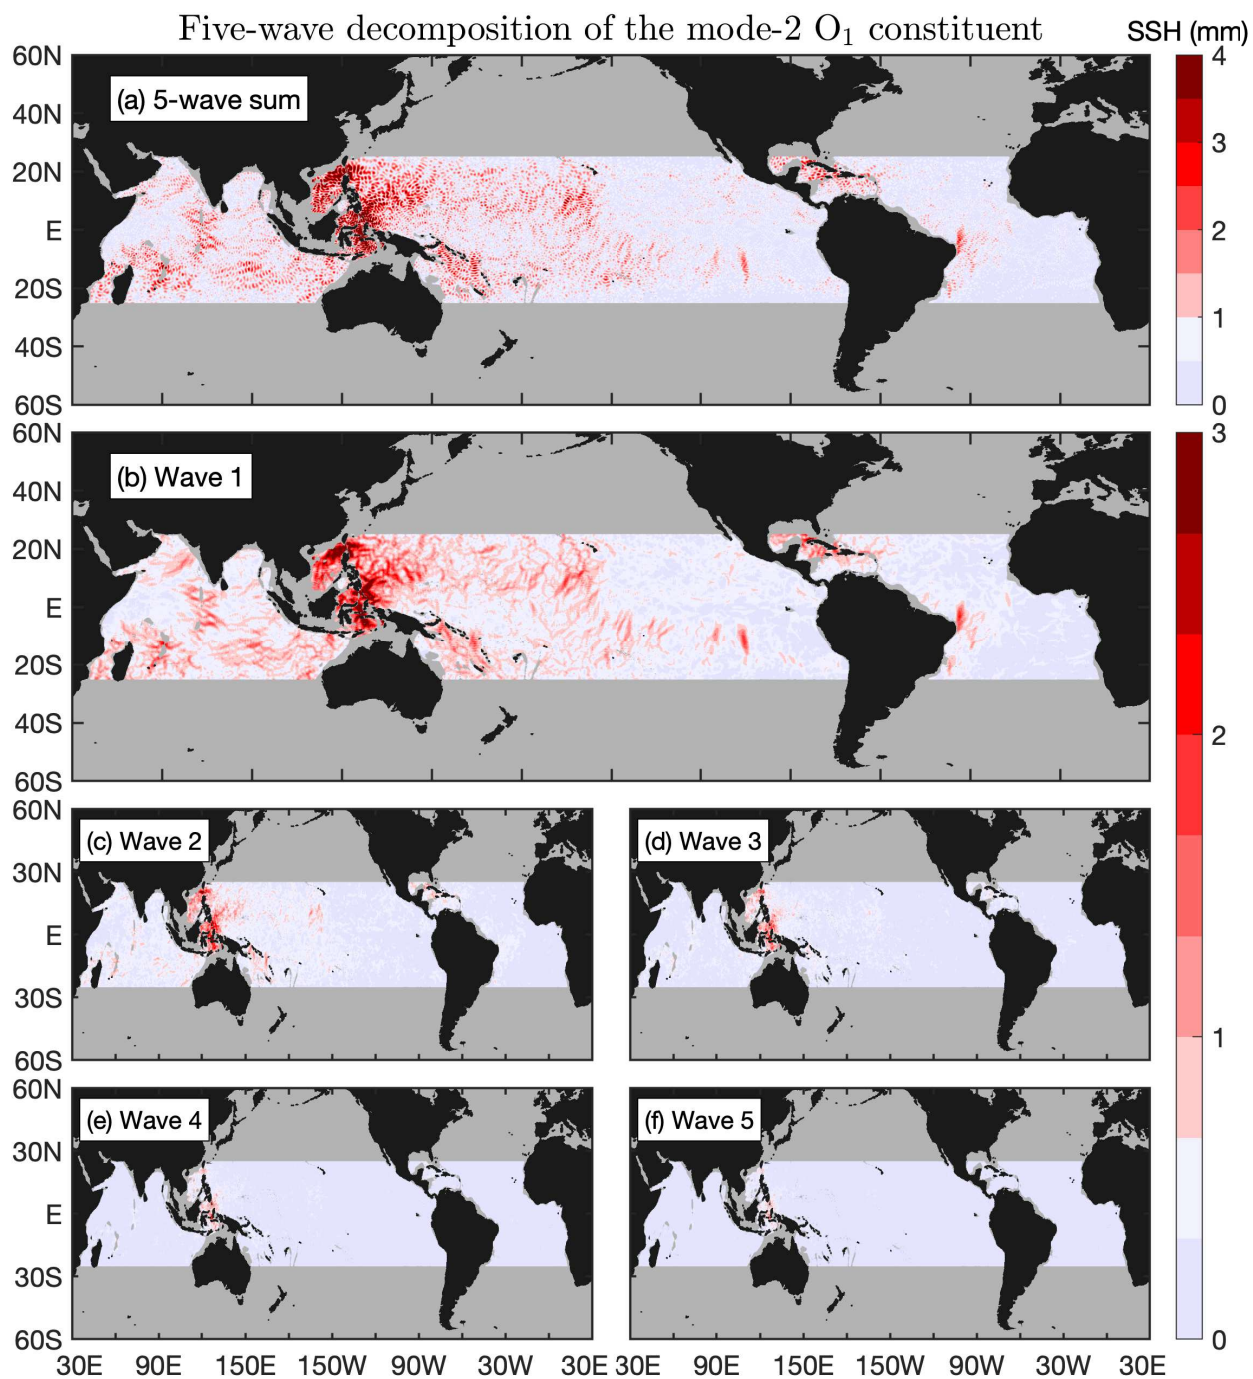

**Figure S12.** As in Figure S9 but for the mode-2  $O_1$  internal tide constituent.



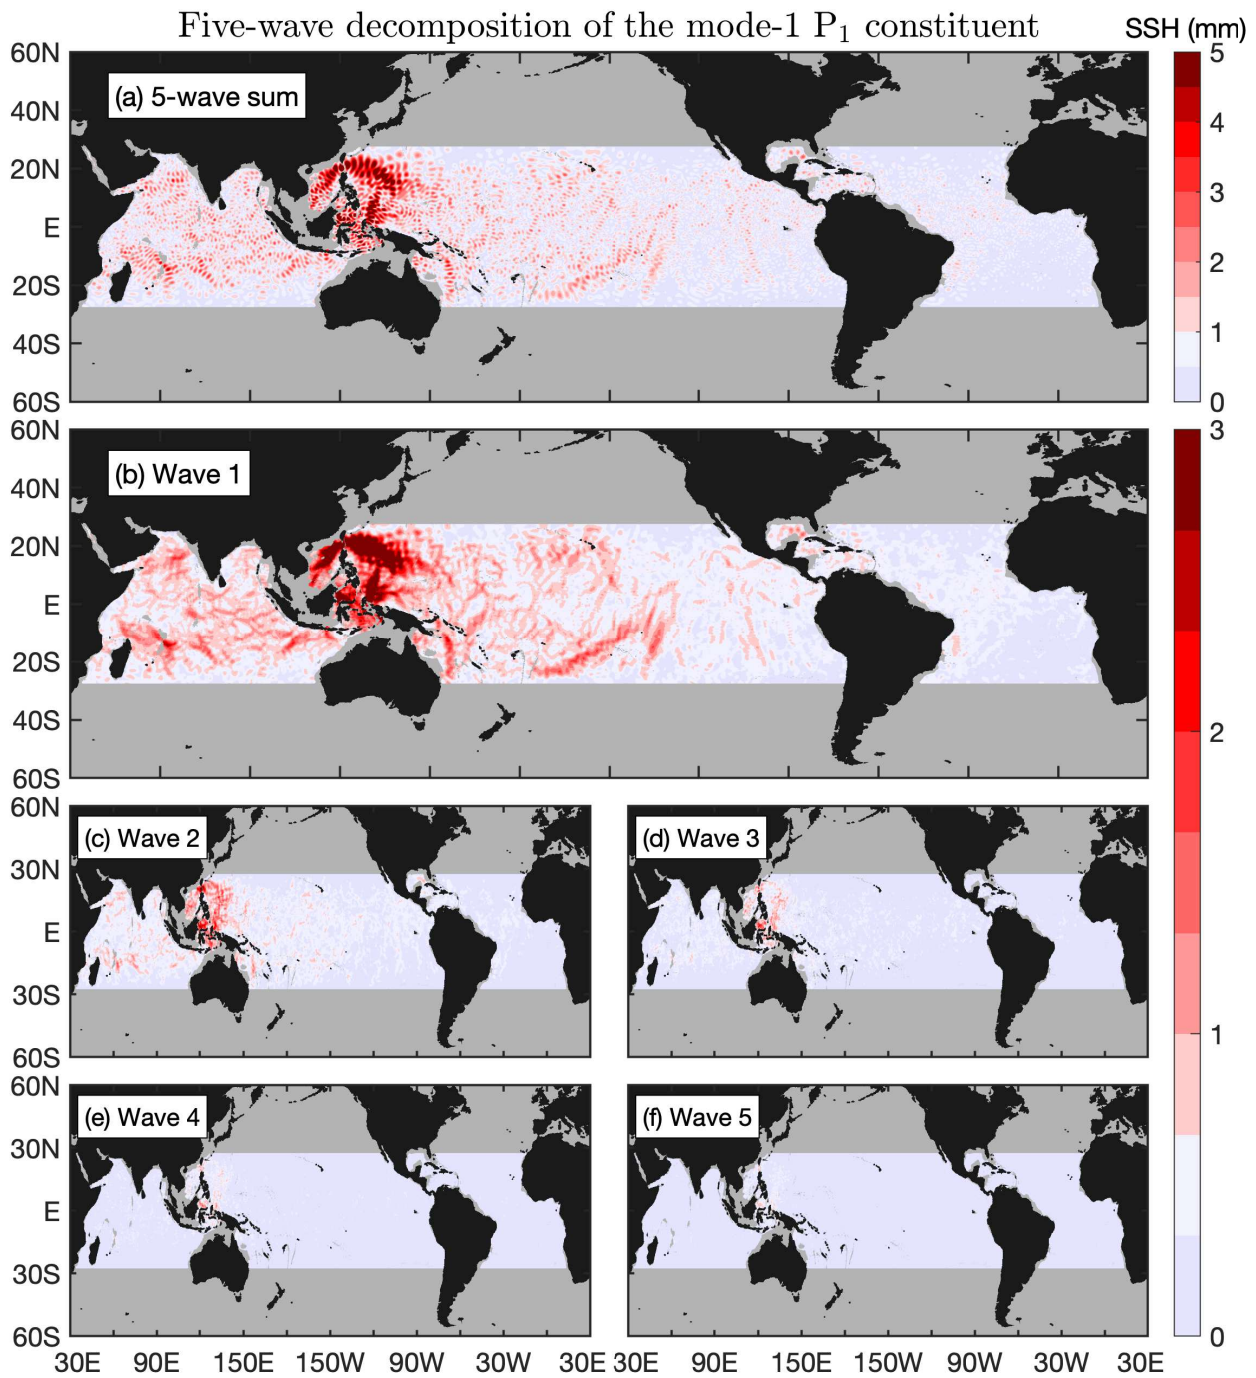

**Figure S13.** As in Figure S9 but for the mode-1  $P_1$  internal tide constituent.

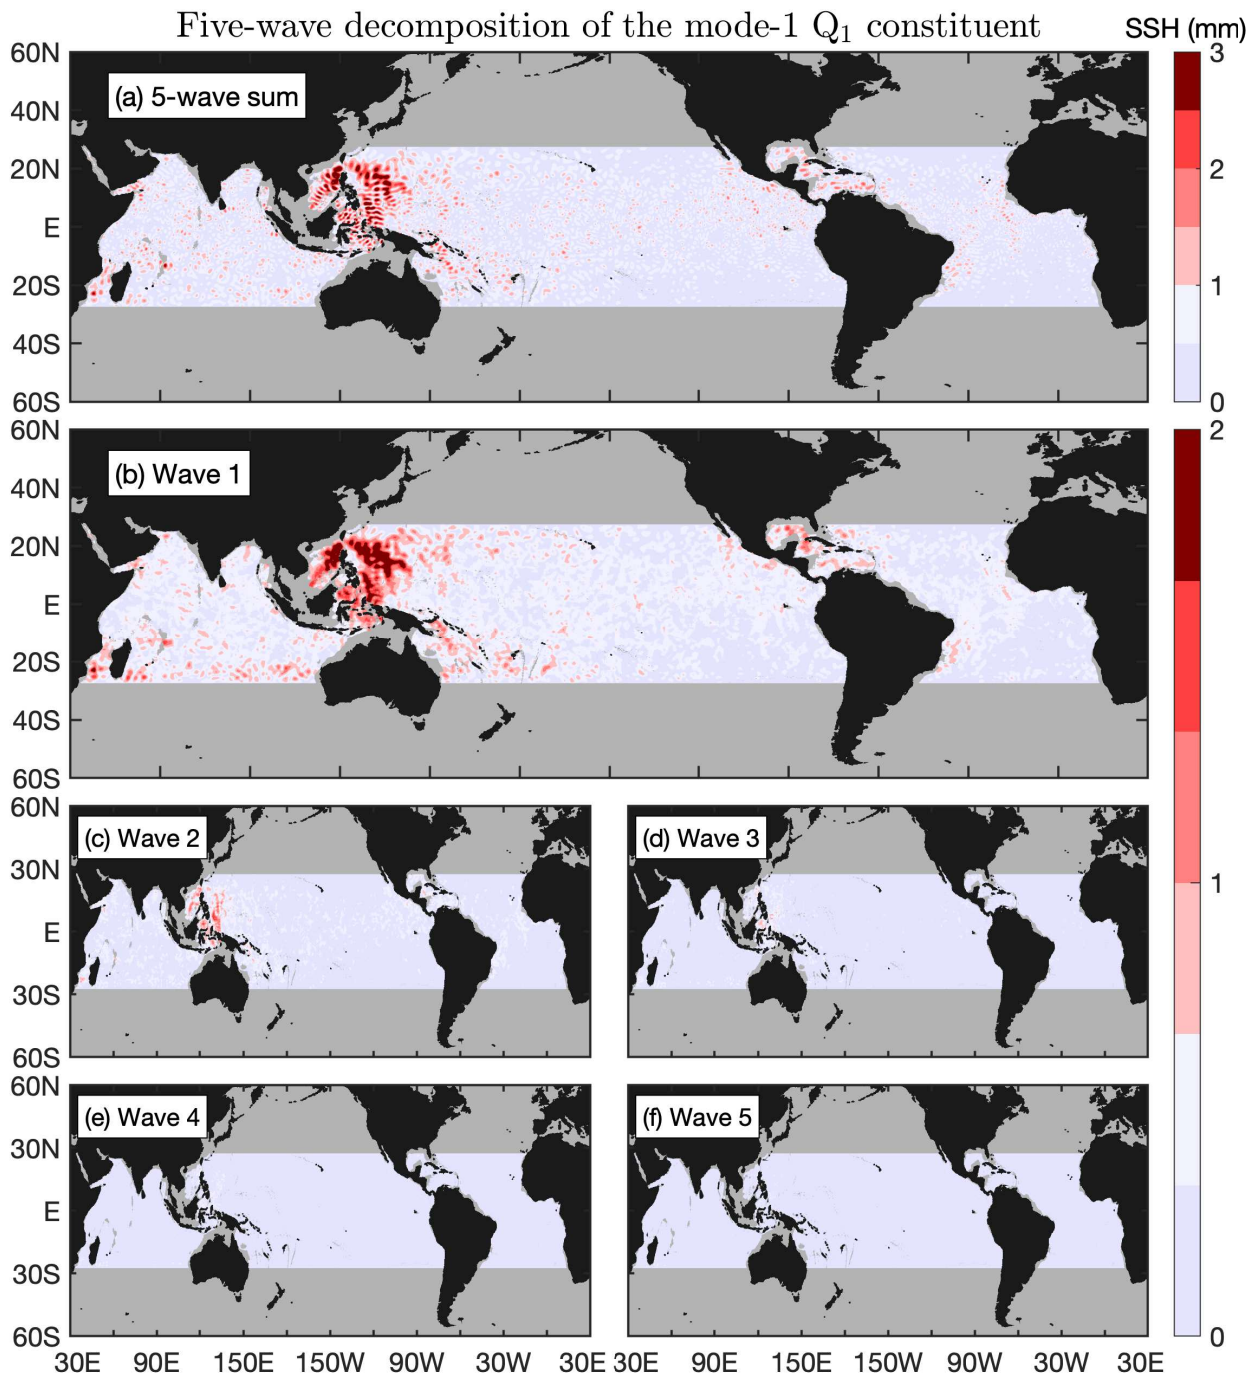

**Figure S14.** As in Figure S9 but for the mode-1  $Q_1$  internal tide constituent.

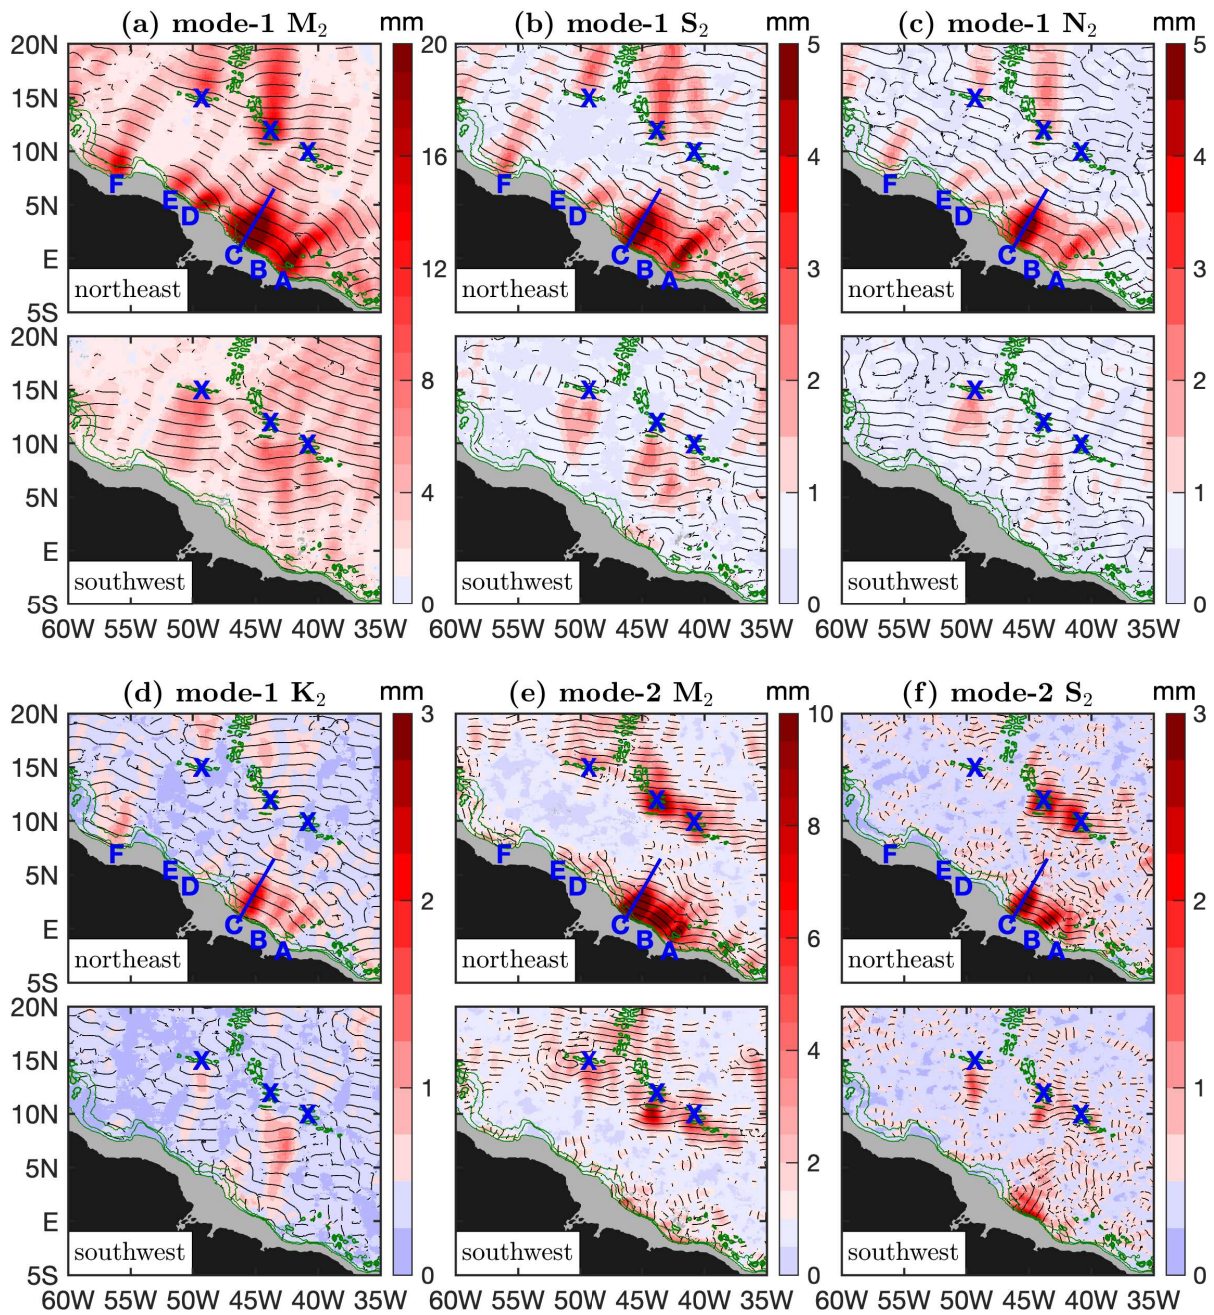

**Figure S15.** Semidiurnal internal tidal beams off the Amazon shelf. Each constituent is divided into northeastward ( $-45^{\circ}$ – $135^{\circ}$ ) and southwestward ( $135^{\circ}$ – $315^{\circ}$ ) components. Black lines indicate the  $0^{\circ}$  co-phase charts. Green contours indicate the 1000-, 2000-, and 3000-m isobaths. Isolated beams off the Amazon shelf are labeled A–F. Blue lines highlight the strongest beams generated at the mouth of the Amazon River. Beams generated at the Mid-Atlantic Ridge are marked.



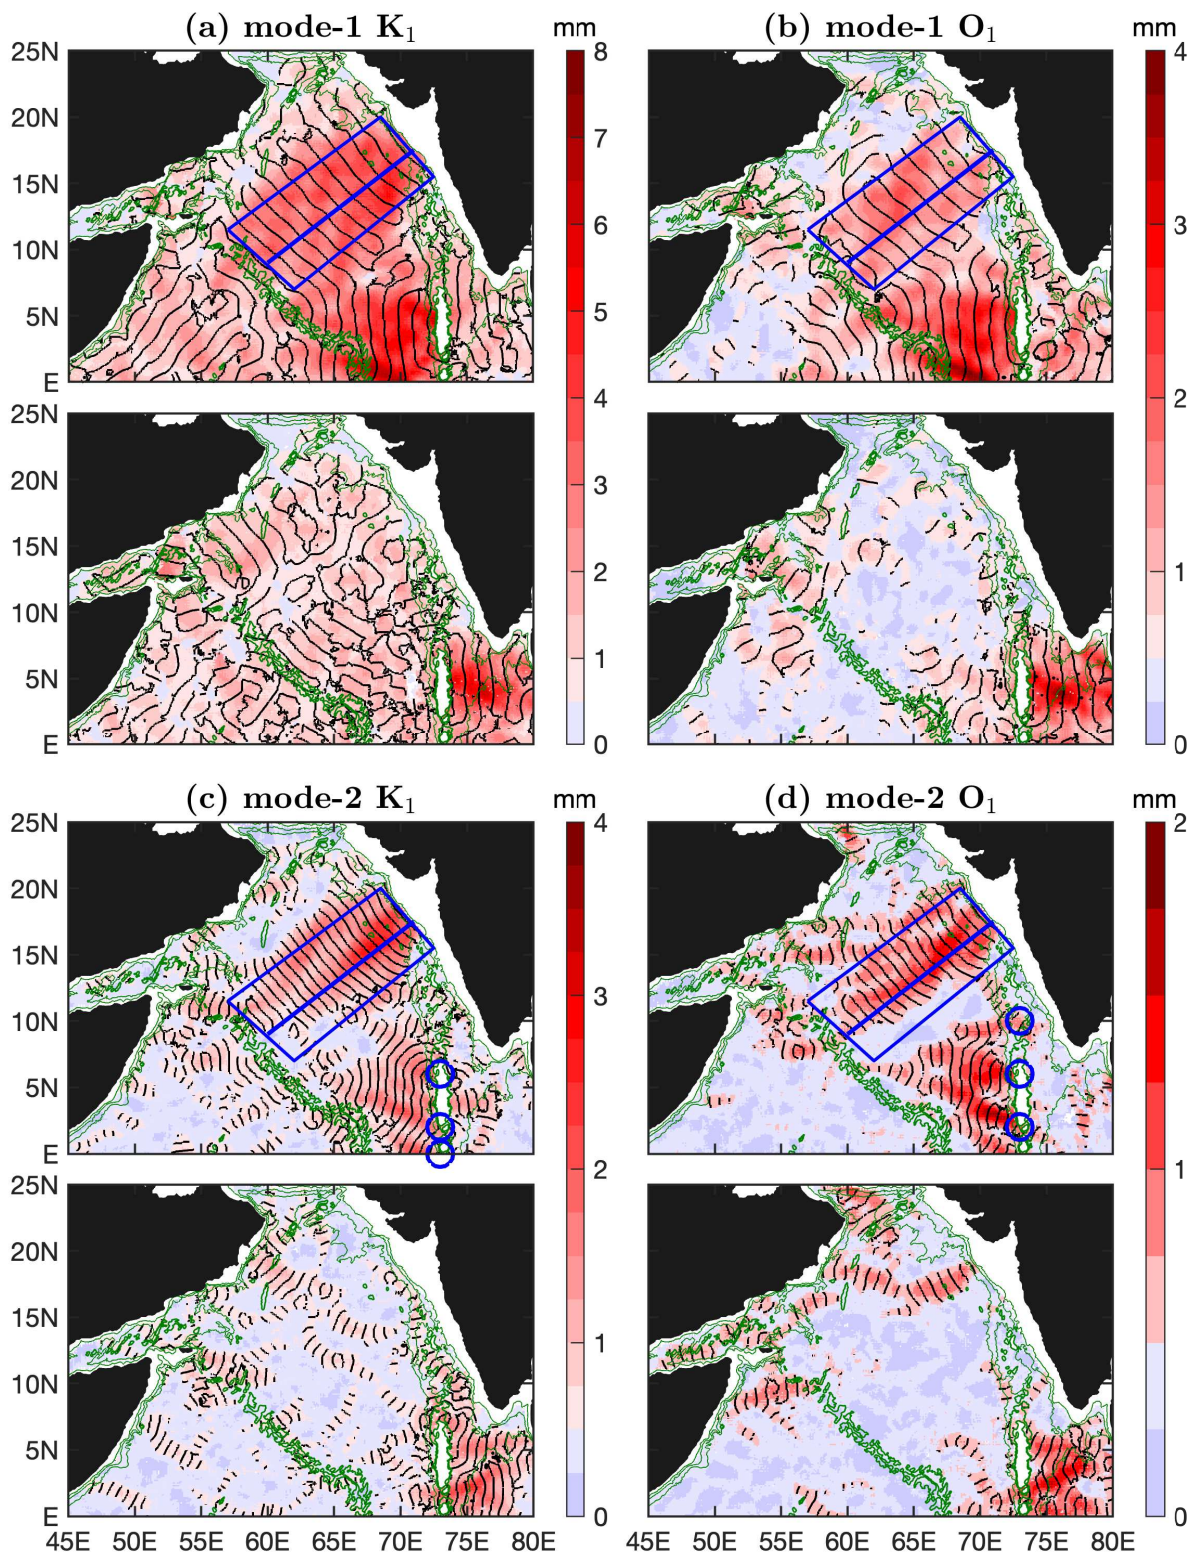

**Figure S16.** Diurnal internal tidal beams in the Arabian Sea. Each constituent is divided into eastward ( $-90^{\circ}$ – $90^{\circ}$ ) and westward ( $90^{\circ}$ – $270^{\circ}$ ) components. Internal tides with amplitudes lower than 0.5 mm are shown in light blue. Black lines indicate the  $0^{\circ}$  and  $180^{\circ}$  co-phase charts. Green contours indicate the 1000-, 2000-, and 3000-m isobaths. Blue circles mark some isolated mode-2 beams at the Chagos–Laccadive Ridge.
