# Supplementary material for: A New-Generation Internal Tide Model Based on 30 Years of Satellite Sea Surface Height Measurements
Source: Copernicus journal article supplement (doi:10.5194/essd-2024-611), 2025-01-20
Supplement: Supplementary file [file essd-2024-611-RC1-supplement.pdf]

1 Review on “A New-Generation Internal Tide Model Based on  
2 30 Years of Satellite Sea Surface Height Measurements”

3 Zhongxiang Zhao

4 January 2025

5 **1 General comments**

6 The article and data set describe a model representing the local sea surface height (SSH) signature  
7 of the spatio-temporally coherent internal tidal field in terms of a superposition of propagating plane  
8 waves (for given tidal constituent and baroclinic mode). Most notably, this new model (ZHAO30yr)  
9 incorporates an unprecedented collection of tidal constituents and vertical modes, mapped at higher  
10 resolution than in previous work by the author, and includes error estimates. The performance  
11 of the model is evaluated using independent altimetry data (using a variance reduction statistics)  
12 showing significant improvement over previous work by the author. These major advances were  
13 made possible mainly by the refinement of the authors’ mapping technique over the years, and the  
14 inclusion of input data from more altimetry missions. In other words, ZHAO30yr is the culmination  
15 of the author’s leading research in mapping internal tides sea surface signature from altimetry data.  
16 Yet, at the same time, ZHAO30yr can be seen as a new starting point for the many potential  
17 improvements suggested in this study.

18 One important feature of the article is the description of the spatial variability in a single com-  
19 ponent of the decomposed multiwave field. The author investigates two decompositions of the  
20 multiwave field: (i) by extracting the (locally) five largest propagating plane waves, and (ii) by  
21 selecting the largest of the previously extracted waves propagating in a given directional range (gen-  
22 erally half circles). While I am convinced that the reconstructed multiwave field is a reasonable

23 representation of the underlying internal tidal SSH field (although all of the five fitted waves might  
24 not be significant everywhere), I have more trouble understanding the analysis of individual plane  
25 wave components as performed in the present study.

26 The article claims that such decompositions can be used to disentangle wave interference and  
27 further isolate internal tidal beams. This is an apparent contradiction, in that these beams are  
28 commonly viewed as an interference pattern resulting from the superposition of waves radiating from  
29 distinct sources (Rainville et al., 2010, see in particular their Fig. 9). The confusion is entertained  
30 by the claim that individual components of the multiwave decomposed SSH are not affected by  
31 multiwave interference (l215 in the article). On the contrary, interference patterns (with nodes and  
32 antinodes separated by half a wavelength) are clearly visible in the decomposed product (see Figs. 3  
33 and 5 in Detailed comments). The above apparent inconsistencies make it challenging for me to  
34 understand what the spatial variability in a single component of the multiwave decomposed field  
35 actually represents (be it the locally largest component or the locally largest one in a directional  
36 range).

37 In any event, I think the article lacks a clear definition of what is considered as "internal tidal  
38 beams". Then, the results based on a single component of the decomposed multiwave field (sections  
39 5 and 6) should be analyzed in a way that is consistent with the latter definition.

40 Another comment is that the general tone of the article is quite enthusiastic (perhaps too much  
41 so), somewhat obscuring the limitations of the model. As a result, non-specialist users of the data  
42 might end up being misled. I would like to see the important limitations and shortcomings of the  
43 model explicitly stated where fit:

- 44 • ZHAO30yr only extracts the spatio-temporally coherent fraction of the ITs. Hence, the decay  
45 in amplitude of an observed internal tidal beam with distance from its source region cannot be  
46 directly related to dissipation (e.g. Zaron, 2015; Buijsman et al., 2017; Geoffroy & Nycander,  
47 2022).
- 48 • ZHAO30yr cannot distinguish between modal ITs originating from barotropic-to-baroclinic  
49 conversion and the waves resulting from scattering of different modes (e.g. by interactions  
50 with topography).

- 51 • Physically, an internal tidal beam is the spatial expression of the interference of multiple waves  
52 radiating from distinct sources (Rainville et al., 2010). Thus, one cannot directly "pinpoint" the  
53 source locations of an observed beam. Moreover, it is not straightforward to gain information  
54 on the generation of the individual baroclinic waves forming a beam.

## 55 2 ESSD's review criteria

- 56 • *Read the manuscript: are the data and methods presented new? Is there any potential of the*  
57 *data being useful in the future? Are methods and materials described in sufficient detail? Are*  
58 *any references/citations to other data sets or articles missing or inappropriate? Is the article*  
59 *itself appropriate to support the publication of a data set?*

60 The methods used in this publication have been used in previous studies (e.g. Zhao et al., 2016,  
61 2019; Zhao, 2021, 2022, 2023, with an evolution throughout the years). I fail to see a significant  
62 difference in the methods compared with Zhao (2023), apart from the inclusion of more tidal  
63 constituents and vertical modes. Another important advance is the use of more altimetry  
64 missions as input data to build the model. The data will very likely be useful in the future.  
65 The methods are described in details, and more information can be found in the previously  
66 mentioned studies. However, I have troubles understanding a few key points in the methods  
67 and presentation of the results (see General comments). These may be misunderstandings,  
68 or simple issues with the terminology used in the paper. Nonetheless, I think these points  
69 should be clarified before publication. The paper generally does a good job citing appropriate  
70 references and other datasets. It could, however, do a better job at pointing at the (important)  
71 limitations of the model.

- 72 • *Check the data quality: is the data set accessible via the given identifier? Is the data set*  
73 *complete? Are error estimates and sources of errors given (and discussed in the article)? Are*  
74 *the accuracy, calibration, processing, etc. state of the art? Are common standards used for*  
75 *comparison? Is the data set significant – unique, useful, and complete?*

76 The data is straightforward to access and use. The data set lacks error estimates for a single  
77 plane wave, as well as the mask for regions of large mesoscale variability where the model

78 likely fails (as explained in the article). In particular, each of the fitted plane wave should be  
79 compared with the local error estimate for a single wave ; as it is likely that not all of the five  
80 fitted waves are significant at any given location. The model, i.e. the sum of the five fitted  
81 plane waves for a given tidal constituent and baroclinic mode, is validated using a variance  
82 reduction statistics, and it is compared to previous iterations showing significant improvement.

- 83 • *Consider article and data set: are there any inconsistencies within these, implausible assertions*  
84 *or data, or noticeable problems which would suggest the data are erroneous (or worse). If*  
85 *possible, apply tests (e.g. statistics). Unusual formats or other circumstances which impede*  
86 *such tests in your discipline may raise suspicion. Is the data set itself of high quality?*

87 As stated above, I think some key points in the methods and presentation of the results should  
88 be clarified. Apart from these, the article properly describes the data set.

- 89 • *Check the presentation quality: is the data set usable in its current format and size? Are the*  
90 *formal metadata appropriate? Check the publication: is the length of the article appropriate?*  
91 *Is the overall structure of the article well structured and clear? Is the language consistent*  
92 *and precise? Are mathematical formulae, symbols, abbreviations, and units correctly defined*  
93 *and used? Are figures and tables correct and of high quality? Is the data set publication, as*  
94 *submitted, of high quality?*

95 The published data set is usable (but still lacks the single wave error estimates and mask for  
96 the regions of large mesoscale variability), and the metadata is appropriate. The publication  
97 is somewhat long but well written and, overall, of good quality.

- 98 • *Finally: By reading the article and downloading the data set, would you be able to understand*  
99 *and (re-)use the data set in the future?*

100 Yes, but at this stage only for the reconstructed multiwave field (i.e. the sum of the locally  
101 fitted plane waves for a given tidal constituent and baroclinic mode). I don't understand the  
102 author's interpretation of the spatial variability in a single wave component.

### 3 Detailed comments

#### Introduction

l25-27: It would be fair to cite Colosi and Munk (2006) as well.

l32: To be complete, you could mention semi-analytical methods as well ; especially the recent anisotropic estimates in Pollmann and Nycander (2023) and Geoffroy et al. (2025), which are particularly suited for a comparison with ZHAO30yr.

Paragraph 34-45: Please make it clear that ZHAO30yr only estimates the spatio-temporally coherent ITs.

l51: The “new” mapping procedure is confusing, this seems to be the same procedure as in Zhao (2022).

l56: Same “newly improved” is confusing.

l57-59: This is confusing. Internal tidal beams are generally considered as the expression of the interference pattern between plane waves originating from different sources (Rainville et al., 2010).

l60: ZHAO30yr only sees the coherent fraction of the IT field, thus any information about dissipation would be non-trivial to retrieve (the decay of a beam with propagation distance in ZHAO30yr can also be attributed to a loss of coherence). ZHAO30yr also cannot distinguish between modal internal tides (ITs) generated by the conversion of surface tides and those resulting from the scattering of different modes. This should be clearly stated.

l62: “background internal tides” is unclear, perhaps mention that this will be explained later on.

l63: Errors are lower than 1 mm on a global average.

l67: ”published in Carrere et al. 2021” → ”mentioned in Carrere et al. 2021”.

l70: ”are previously masked” → ”were previously masked”.

l78: ”Appendix ??”. The appendix appears to be missing (it is not included in the manuscript and supplementary material.) This sentence is unclear at this stage.

l84: ”including all altimetry [...]” already written at the beginning of the paragraph.

#### Section 2.1

l89: ”Direct” → ”Directly”

130 195: add "leaked" internal tide signals ?

131 198: Taking into account the spatial variations in  $\lambda$ , depending on location one can have  $\lambda$  larger  
132 than the cutoff wavelength for the mesoscale field. Hence, this low-pass filtering of the mesoscale  
133 estimate does not consistently remove the leaked IT variance (resulting in a biased low IT variance  
134 in the results). Applying another (lowpass) filter in frequency might mitigate this, as suggested by  
135 Zaron and Ray (2018). In this paper, they also note that the diurnal ITs are more closely entangled  
136 with mesoscale dynamics (compared with semidiurnal ITs), so that you may have more leakage from  
137 mesoscale activity in your diurnal products.

## 138 Section 2.2

139 1106: Can you demonstrate that these 2 constituent pairs are well separated in ZHAO30yr ?

140 1113: Do you use the rigid-lid approximation, namely  $\Phi(z = 0) = 0$  ? If not, the problem you  
141 solve is not trivial to me. Could you mention the boundary condition you use at the surface and  
142 how you normalize the eigenfunctions (and provide a reference) ? One example is Kelly (2016).

143 1115: I think the equation should read  $\lambda_n = \omega c_n / \sqrt{\omega^2 - f^2}$ , see for instance Eq. (A5) in Zhao  
144 et al. (2016).

145 1118: What about the temporal variation in  $\lambda$  over seasonal, and inter-annual timescales ? It  
146 would be worth comparing this time variability with the bandpass width of the 2D filter.

147 1123: Can you justify that such close constituents are well separated in ZHAO30yr ?

## 148 Section 3

149 The method extracts 5 independent propagating waves with a target  $\lambda$  and  $\omega$ . Signatures of  
150 other processes than ITs (sharing a similar  $\lambda$  and  $\omega$ ) might be picked up: the mesoscale correction  
151 is not perfect, and there may be other waves (e.g. westward propagating tropical instability waves  
152 as mentioned in Zhao (2019)). The main assumption here is that only ITs can show the observed  
153 spatio-temporal coherent structures over the 30 years of data. Do I get this right ? (If yes, I think  
154 this could be made clearer).

155 1131: Truncating the 2D spectrum (i.e. multiplying it by a rectangular window) will result in  
156 ringing, you might want to use a window with a smoother roll-off.

157 **Section 3.1**

158 Could you mention how do you bin the altimetry data in time ? What tolerance do you use to  
159 consider two measures collocated in time ? What would a typical snapshot look like in terms of  
160 point density within a fitting window ?

161 Eq. (2): If I am not mistaking, this equation represents waves emanating from an infinitely long  
162 line source. This might be a good representation far away from the actual sources (of finite length),  
163 but not so much close to generation sites (where I would expect the waves to spread cylindrically).  
164 See Fig 1 for an example mode-1 M2 plane wave (in a correspondingly sized fitting window) using  
165 values from Table 1 in the article. Could the extent of the spatial window (smaller than a wavelength  
166 here) negatively impact the fit ?

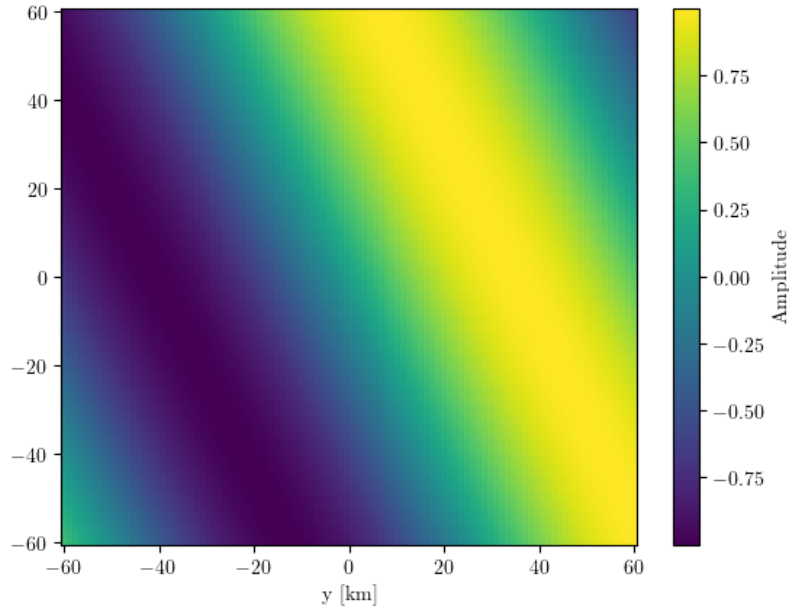

Figure 1: Mode-1 M2 plane wave as per Eq. (2) for a single  $m$  in a 120 km fitting window using the mean parameters from Table 1.

167 1148-154: It took me several reads to understand this procedure, this could be rewritten to make  
168 it clearer. The wording is confusing: "target internal tidal wave" is a sum of "5 internal tidal waves",  
169 perhaps the latter could be simply called plane waves. Also, you could explicitly state at what stage  
170  $A_m$ ,  $\phi_m$ , and  $\theta_m$  are obtained.

171 1150: Is the least squares fit performed in each compass direction ? If yes, it should be mentioned  
172 in the following sentence for the sake of clarity.

173 Each plane wave fit should be compared with the estimated error (using "background" ITs or  
174 some other error estimate). Fits resulting in an amplitude below the estimated error should be  
175 discarded (as in Zhao et al. (2016)). Also, the error associated with a single plane wave should be  
176 included in the dataset.

## 177 Section 3.2

178 1159: "in one overlapping 850 by 850 km" → "in overlapping 850 by 850 km windows" ?

179 1161: "is nontidal errors' → " is considered as noise" ?

180 1162: Is truncation done with a rectangular window ? Does this introduce ringing ? If yes, did  
181 you evaluate/mitigate it ?

182 The truncated spectra may still contain some background noise, not only the tidal peaks. Per-  
183 haps this background noise level could be estimated from the variance just outside the theoretical  
184 wavenumber range.

## 185 Section 3.3

186 1168: "S2 has an tidal aliasing" → "S2 has an aliasing issue"

187 1172: "wavenumber-frequency filtering": I understand that you only filter in wavenumber space  
188 (but you select the frequency during the least square fit).

189 1181: Could you point to the section where these results are presented ?

190 1184-185: I see that bandpass width times  $\lambda$  overlaps for mode-1 and mode-2 waves. But it is not  
191 obvious to me why mode 1 can affect mode 2 but not the other way around. Could you elaborate ?

## 192 Section 3.4

193 1193: define major/minor constituents.

194 1200: This light blue color code for amplitudes lower than 1 mm does not reflect the spatial  
195 variability of the error and may be misleading. Can you think of a better representation including



196 the geographical variability of the error ? I realize discarding the results where the amplitude is  
 197 smaller than the error may not be a very good solution neither since a large fraction of the global  
 198 field would be masked (see Fig. 2). Perhaps you could discard data based on the variance reduction  
 199 statistics computed in section 4.2 ?

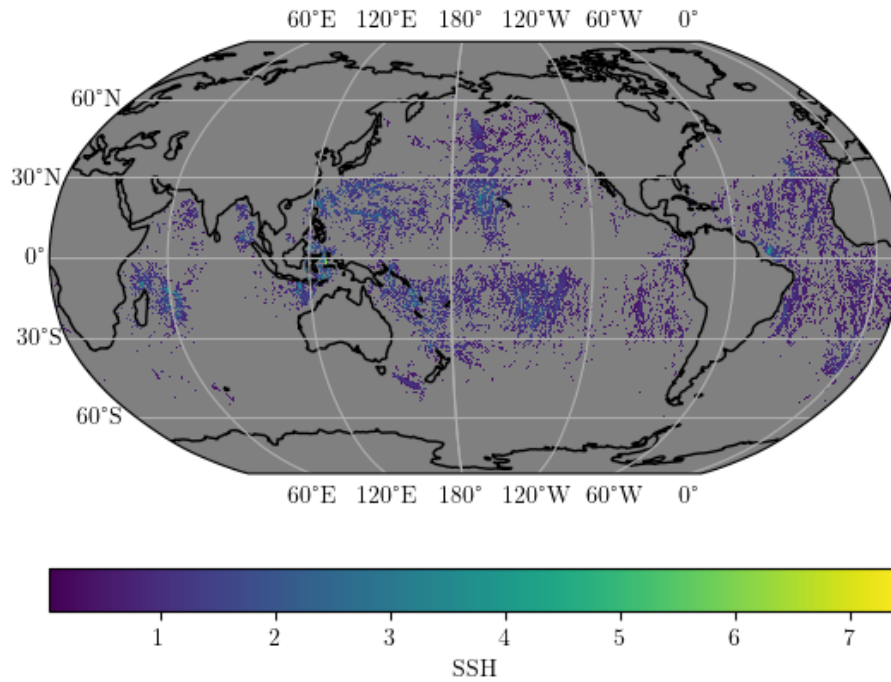

Figure 2: Mode-1 M2 internal tide amplitude (sum of the 5 fitted plane waves), masked where the amplitude is smaller than the provided error for mode-1 semidiurnal ITs.

200 l201: Consider publishing your mask excluding the regions of large mesoscale variability alongside  
 201 the data.

202 l202: "have largest amplitudes" → "have the largest amplitudes"

203 l203: same for "lowest"

### 204 Section 3.5

205 l210: "5 waves of arbitrary directions" → "arbitrary" may not be adapted here. Perhaps rewrite  
 206 in something like "the 5 most prominent plane waves with empirically determined directions".

207 l215: I disagree, interference patterns with half-wavelength fluctuations are clearly visible in the

208 decomposed wave field. In Fig. 3, I attach detail maps of an area between Hawaii and the Aleutian  
 209 Islands displaying a marked interference pattern in the North-South direction in the mode-1 M2  
 210 first (largest) plane wave (IW1). This can also be seen in your maps in supplementary material for  
 211 mode-1 M2, N2 (and S2 to a lesser extent). Diurnal constituents seem affected as well (in particular,  
 212 IW1 in mode-1 K1 west of India shows similar fluctuations in the East-West direction, see Fig. 5).

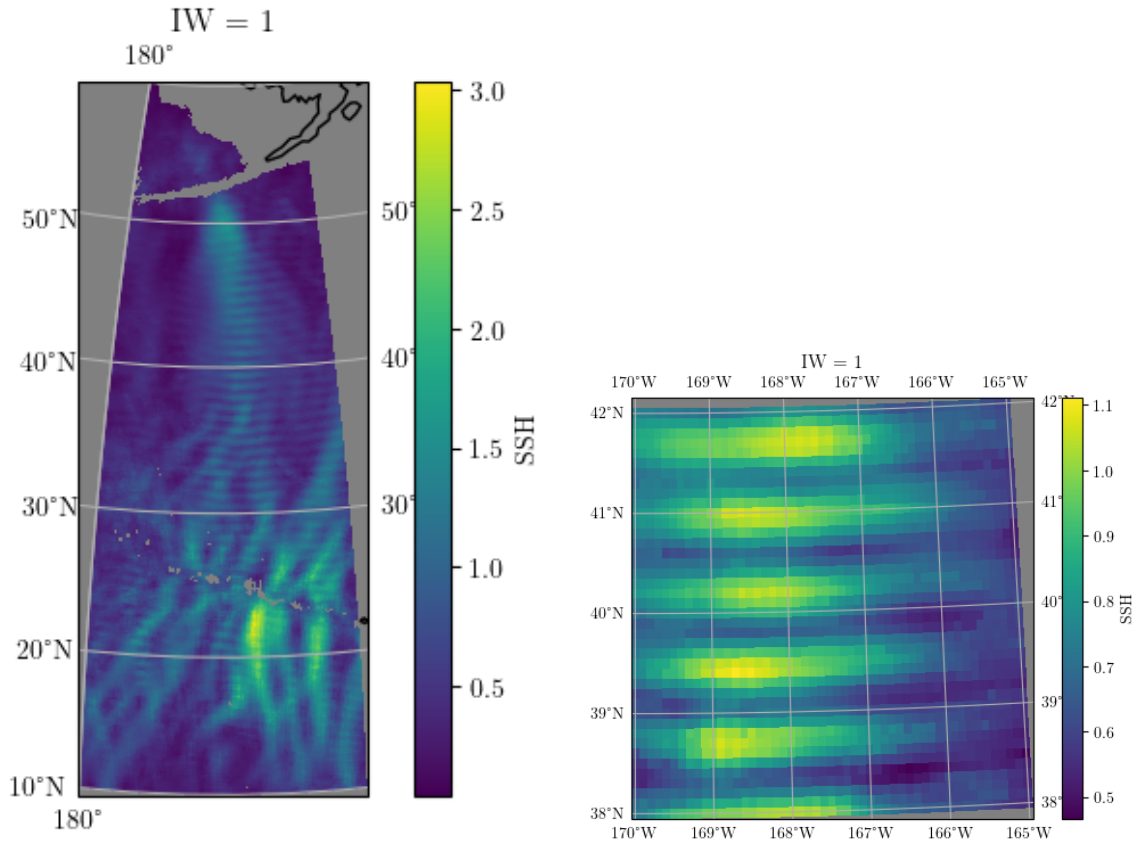

Figure 3: Left panel: Amplitude of the first plane wave for the mode-1 M2 internal tide, an interference pattern is clearly visible (horizontal darker and lighter rays with wavelength of about  $\lambda/2$ ); Right panel: Zoom in the interference pattern.

213 l216: "new features that are previously masked" → "new features that were previously masked"  
 214 l215-224: This is confusing. Internal tidal beams are an interference pattern, I don't understand  
 215 how you could locally represent a beam as a single plane wave as defined in Eq. (2) (for a single  $m$ ,  
 216 see Fig. 1).

217 l222: Do you mean the decomposed multiwave field ?

218 l223: Yes, looking at a decomposition by propagation direction might be a more consistent  
219 approach. Still, I don't quite understand how you could assimilate the amplitude of the largest  
220 plane wave in a directional range to a beam.

221 figure 2: Hard to read, panels are too small.

## 222 Section 4.1

223 l238: The corresponding mask is not included with the published data.

224 l240: "reliably" might be an overstatement, especially at the global scale (as you discuss in  
225 section 4.2).

226 Figure 3: The statistics seem to be computed including regions of large mesoscale variability,  
227 discarding these regions (as stated in the text) will improve the results.

## 228 Section 4.2

229 l244: "(amplitudes and phases)" → "(amplitude and phase of each constituent)"

230 l246-247: should read  $T_n$ ,  $f_n(t)$ ,  $u_n(t)$ ,  $A_n(x, y)$ , and  $\phi_n(x, y)$ .

231 l249: delete "Here" or → "Here,"

232 l254: "is the variance difference" → "is the difference in variance computed"

233 l256-257: confusing, rephrase.

234 l262: "real internal tides" → "predicted internal tides"

## 235 Section 4.3

236 figure 4: Hard to read, panels are too small.

237 l292: internal tidal beams are presents in all products, rephrase.

## 238 Section 5.1

239 l306-307: as well as in studies based on in situ observations, it would be fair to mention a few of  
240 these as well.

241 l310: "But" → "Note"

242 l312-313: These single-wave error estimates are not published with the data.

243 l316-318: unclear, rephrase.

244 l325: "Section 6.1 has shown" → "Section 6.1 shows"

245 Figure 8: delete "[too many circles]" in caption

246 l329: This is unclear. The detection of mode-2 M2 ITs with altimetry might be strongly in-  
247 fluenced by the stratification structure, but not so much the underlying true wave field (other  
248 parameters set the generation, e.g. the topographic wavelength (Llewellyn Smith & Young, 2002)).  
249 You should also mention that mode-2 waves tend to be more incoherent.

250 l342: "The mode-1 and mode-2 beams" → "The detected mode-1 and mode-2 beams". Item (1),  
251 and perhaps item (2), can be partly explained by mode-2 waves being more incoherent than mode-1  
252 waves (e.g. Rainville & Pinkel, 2006). Also, a possible explanation for item (2) could be that the  
253 interference of the shorter mode-2 wavelengths results in narrower beams compared with mode 1.

254 l346: item (3), linear theory is instructive here: it predicts very small conversion where the  
255 topographic length scale does not match the wavelength of the wave (Llewellyn Smith & Young,  
256 2002). In other words, surface tide conversion into mode 2 is maximized at topographic features  
257 with length scales close to the shorter mode-2 wavelength.

258 l347: Again this is confusing, the beams are not generated at a point location, they are the result  
259 of the interference of multiple (line) sources.

260 l349: This is wrong, mid-ocean ridges also generate significant mode-2 M2 ITs. See global map  
261 of the M2 mode-2 generation from linear theory in Geoffroy et al. (2024).

262 l350-351: The model also have important limitations that should be clearly mentioned (only  
263 coherent ITs, interference pattern present in the amplitude of the individual fitted plane waves,  
264 separation of barotropic conversion and scattering processes).

## 265 Section 5.2

266 l361: "; however," → ", however,"

267 l365: Could (1) be explained by weaker S2 barotropic tide as in (2) ?

268 **Section 5.3**

269 l382: "summed filed" → "summed field"

270 l382: "beams are masked by multiwave interference", rewrite.

271 **Section 5.5**

272 l410-411: eastern/western hemisphere relative to 120 deg W ? (State reference longitude to avoid  
273 confusion.)

274 l422: "Figure 13b, circle", which circle ?

275 l423: "Figure 13b, circle", which circles ? (Use different colors to distinguish from the Mona  
276 Passage.)

277 l435: "pinpoint" is confusing.

278 l437: Unclear, rewrite.

279 l438: Already stated above, delete sentence (and typo in "K2").

280 Fig. 14, 15, 16: mention blue circles in caption ?

281 **Section 5.6**

282 l441: "but that the K1" delete "that" ?

283 l446: "Another similar feature" add "with mode-1 K1".

284 **Section 6.1**

285 l494: The beams are actually clearly visible from the summed plane wave product (see Fig. 4).  
286 The directional decomposition offers a cleaner view of the beams.

287 Figure 19: Title of (h), typo in "mode-2 S2".

288 Last line of caption, "flurier 2D filtering" → "Fourier 2D filtering".

289 Last line of caption: On the contrary, this last observation seems consistent with the literature:  
290 The maximum in SSH occurring at some distance away from the generation site(s) has been observed  
291 and modeled in previous studies. This has been related to the first surface bouncing of the tidal

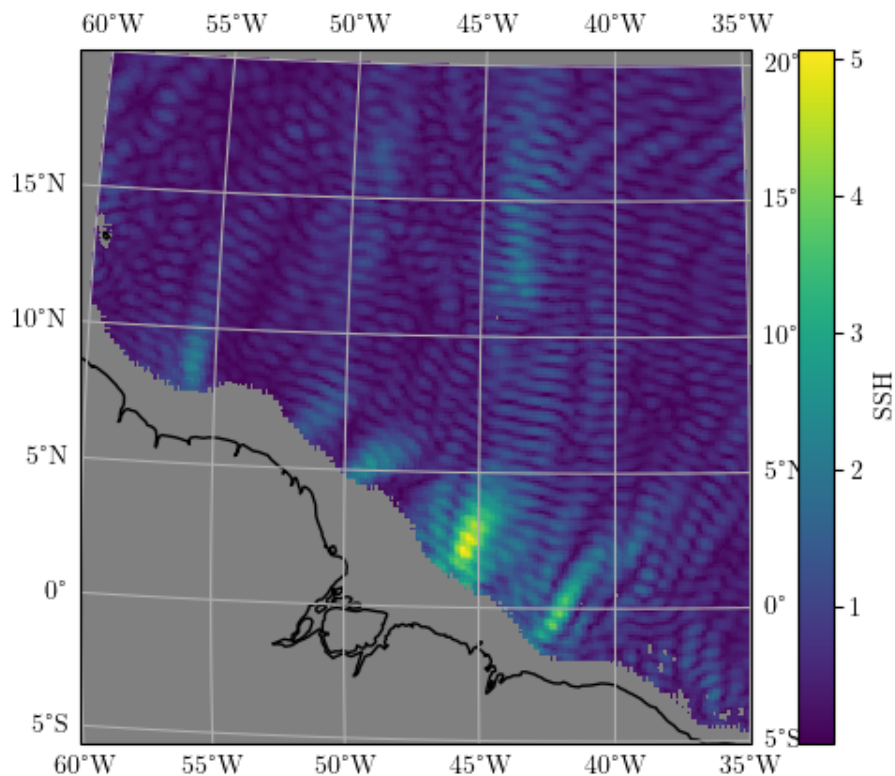

Figure 4: Mode-1 M2 internal tide amplitude (sum of the 5 fitted plane waves) close the Amazon mouth.

292 beam (Merrifield & Holloway, 2002; Carter et al., 2008). This could also be interpreted as the  
 293 expression of interference between multiple plane waves (Rainville et al., 2010)).

294 l501: Could you explain ? Is this because of the superposition with waves (reflecting or originat-  
 295 ing) from the Mid-Atlantic Ridge ?

296 l505: It would be good to remind that the decay in amplitude of a spotted beam with propagation  
 297 distance is partly due to the growing fraction of incoherent ITs (not being taken into account in  
 298 your model).

299 l514: Since you mention possible comparisons, the semi-analytical estimates from Pollmann and  
 300 Nycander (2023), and Geoffroy et al. (2025) are also particularly suited for a comparison with  
 301 ZHAO30yr.

302 l515: "temporal variation of semidiurnal ITs", unclear. do you refer to the beat originating

303 from the sum of the constituents close to the M2 frequency ?

## 304 Section 6.2

305 1528: Typo "the the four diurnal". Also, you rather show the two first modes of the two diurnal  
306 constituents O1 and K1.

307 1533-535: This beam is actually solely due to IW1 in the plane wave decomposed field (see Fig. 5).  
308 Furthermore, an interference pattern with half-wavelength fluctuations is clearly visible within the  
309 area of the beam. Hence, Fig. 20 a is challenging to interpret. Nonetheless, the evolution of phase  
310 and amplitude along the putative trajectory look convincing.

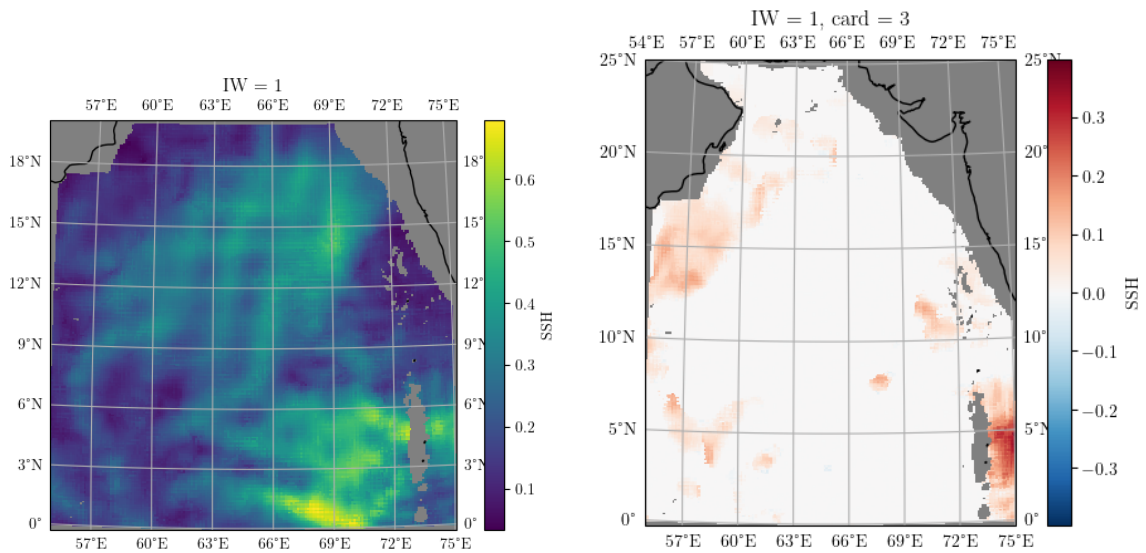

Figure 5: Left panel: Amplitude of the first plane wave for the mode-1 K1 internal tide (IW1), an interference pattern is clearly visible (both vertical and horizontal darker and lighter rays with wavelength of about  $\lambda/2$ ); Right panel: IW1 minus the westward component of the directionally decomposed internal tidal field.

311 1535: "repeat cycles", unclear. Do you refer to a satellite mission in particular ?

312 1537: "beams [...] composed of narrow beams" is unclear, rephrase.

313 1541: That's the 2 first modes of 2 constituents.

314 1545: "pinpoint", again, not exactly.

## 315 Summary

316 l549: delete "new", it has been published already.

317 l554: "down to lower than 1mm" add "on a global average".

318 l559: "the internal tidal field into" → "the internal tidal field is decomposed into"

319 l560: I would be more nuanced on the results of the multiwave decomposition (specifically for  
320 the presence of interference patterns in a single plane wave field).

321 l564: reference for ZHAO20yr ?

322 l569: To be nuanced: the beam generation does not occur at a single source point (Rainville et  
323 al., 2010). Moreover, incoherence acts to decrease the detected beams' amplitude with propagation  
324 distance, this is not straightforward to disentangle from dissipation.

325 l571: "off the Amazon shelf recognized" → "off the Amazon shelf have been recognized"

326 l573: "For mode-2 constituents" → "For M2 and S2 mode-2 internal tides"

327 l575-577: The mode-1 K1 beam you identified west of India corresponds to the first (largest)  
328 fitted plane waves in this region. This is inconsistent with the commonly accepted view of a beam  
329 resulting from the interference between multiple plane waves emanating from distinct generations  
330 sites.

331 l579: The beams have already been identified in previous studies. Also, you already stated this  
332 in point 4.

## 333 References

- 334 Buijsman, M. C., Arbic, B. K., Richman, J. G., Shriver, J. F., Wallcraft, A. J., &  
335 Zamudio, L. (2017). Semidiurnal internal tide incoherence in the equatorial pa-  
336 cific. *Journal of Geophysical Research: Oceans*, *122*(7), 5286-5305. Retrieved  
337 from <https://agupubs.onlinelibrary.wiley.com/doi/abs/10.1002/2016JC012590> doi:  
338 <https://doi.org/10.1002/2016JC012590>
- 339 Carter, G. S., Merrifield, M. A., Becker, J. M., Katsumata, K., Gregg, M. C., Luther, D. S.,  
340 ... Firing, Y. L. (2008). Energetics of m2 barotropic-to-baroclinic tidal conversion at the  
341 hawaiian islands. *Journal of Physical Oceanography*, *38*(10), 2205 - 2223. Retrieved from



342 <https://journals.ametsoc.org/view/journals/phoc/38/10/2008jpo3860.1.xml> doi:  
343 10.1175/2008JPO3860.1

344 Colosi, J. A., & Munk, W. (2006). Tales of the venerable honolulu tide  
345 gauge. *Journal of Physical Oceanography*, 36(6), 967 - 996. Retrieved from  
346 <https://journals.ametsoc.org/view/journals/phoc/36/6/jpo2876.1.xml> doi:  
347 10.1175/JPO2876.1

348 Geoffroy, G., Kelly, S. M., & Nycander, J. (2025). Tidal conversion into vertical normal modes  
349 by continental margins. *Geophysical Research Letters*, 52(1), e2024GL112865. Retrieved  
350 from <https://agupubs.onlinelibrary.wiley.com/doi/abs/10.1029/2024GL112865>  
351 (e2024GL112865 2024GL112865) doi: <https://doi.org/10.1029/2024GL112865>

352 Geoffroy, G., & Nycander, J. (2022). Global mapping of the nonstationary semidiurnal internal  
353 tide using argo data. *Journal of Geophysical Research: Oceans*, 127(4), e2021JC018283. doi:  
354 10.1029/2021JC018283

355 Geoffroy, G., Pollmann, F., & Nycander, J. (2024). Tidal conversion into vertical normal modes  
356 by near-critical topography. *Journal of Physical Oceanography*, 54(9), 1949 - 1970. doi:  
357 10.1175/JPO-D-23-0255.1

358 Kelly, S. M. (2016). The vertical mode decomposition of surface and in-  
359 ternal tides in the presence of a free surface and arbitrary topography.  
360 *Journal of Physical Oceanography*, 46(12), 3777 - 3788. Retrieved from  
361 <https://journals.ametsoc.org/view/journals/phoc/46/12/jpo-d-16-0131.1.xml>  
362 doi: 10.1175/JPO-D-16-0131.1

363 Llewellyn Smith, S. G., & Young, W. R. (2002). Conversion of the barotropic tide. *Journal of Physical*  
364 *Oceanography*, 32(5), 1554 - 1566. doi: 10.1175/1520-0485(2002)032<1554:COTBT>2.0.CO;2

365 Merrifield, M. A., & Holloway, P. E. (2002). Model estimates of m2 internal tide energetics  
366 at the hawaiian ridge. *Journal of Geophysical Research: Oceans*, 107(C8), 5-1-5-12. doi:  
367 10.1029/2001JC000996

368 Pollmann, F., & Nycander, J. (2023). Resolving the horizontal direction of internal tide generation:  
369 global application for the m2 tide's first mode. *J. Phys. Oceanogr.*, 53(5), 1251 - 1267. doi:  
370 10.1175/JPO-D-22-0144.1

- 371 Rainville, L., Johnston, T. M. S., Carter, G. S., Merrifield, M. A., Pinkel, R., Worcester, P. F., &  
372 Dushaw, B. D. (2010). Interference pattern and propagation of the m2 internal tide south of  
373 the hawaiian ridge. *Journal of Physical Oceanography*, *40*(2), 311 - 325. Retrieved from  
374 <https://journals.ametsoc.org/view/journals/phoc/40/2/2009jpo4256.1.xml> doi:  
375 10.1175/2009JPO4256.1
- 376 Rainville, L., & Pinkel, R. (2006). Propagation of low-mode internal waves through  
377 the ocean. *Journal of Physical Oceanography*, *36*(6), 1220 - 1236. Retrieved  
378 from <https://journals.ametsoc.org/view/journals/phoc/36/6/jpo2889.1.xml> doi:  
379 10.1175/JPO2889.1
- 380 Zaron, E. D. (2015). Nonstationary internal tides observed using dual-satellite al-  
381 timetry. *Journal of Physical Oceanography*, *45*(9), 2239 - 2246. Retrieved from  
382 <https://journals.ametsoc.org/view/journals/phoc/45/9/jpo-d-15-0020.1.xml> doi:  
383 10.1175/JPO-D-15-0020.1
- 384 Zaron, E. D., & Ray, R. D. (2018). Aliased tidal variability in mesoscale sea level anomaly  
385 maps. *Journal of Atmospheric and Oceanic Technology*, *35*(12), 2421 - 2435. Retrieved from  
386 <https://journals.ametsoc.org/view/journals/atot/35/12/jtech-d-18-0089.1.xml>  
387 doi: 10.1175/JTECH-D-18-0089.1
- 388 Zhao, Z. (2019). Mapping internal tides from satellite altimetry without blind direc-  
389 tions. *Journal of Geophysical Research: Oceans*, *124*(12), 8605-8625. Retrieved  
390 from <https://agupubs.onlinelibrary.wiley.com/doi/abs/10.1029/2019JC015507> doi:  
391 <https://doi.org/10.1029/2019JC015507>
- 392 Zhao, Z. (2021). Seasonal mode-1 m2 internal tides from satellite altime-  
393 try. *Journal of Physical Oceanography*, *51*(9), 3015 - 3035. Retrieved from  
394 <https://journals.ametsoc.org/view/journals/phoc/51/9/JPO-D-21-0001.1.xml> doi:  
395 10.1175/JPO-D-21-0001.1
- 396 Zhao, Z. (2022). Satellite estimates of mode-1 m2 internal tides using nonrepeat altime-  
397 try missions. *Journal of Physical Oceanography*, *52*(12), 3065 - 3076. Retrieved from  
398 <https://journals.ametsoc.org/view/journals/phoc/52/12/JPO-D-21-0287.1.xml> doi:  
399 10.1175/JPO-D-21-0287.1

400 Zhao, Z. (2023). Mode-1  $n_2$  internal tides observed by satellite altimetry. *Ocean Science*, 19(4),  
401 1067–1082. Retrieved from <https://os.copernicus.org/articles/19/1067/2023/> doi:  
402 10.5194/os-19-1067-2023

403 Zhao, Z., Alford, M. H., Girton, J. B., Rainville, L., & Simmons, H. L.  
404 (2016). Global observations of open-ocean mode-1  $m_2$  internal tides.  
405 *Journal of Physical Oceanography*, 46(6), 1657 - 1684. Retrieved from  
406 <https://journals.ametsoc.org/view/journals/phoc/46/6/jpo-d-15-0105.1.xml> doi:  
407 10.1175/JPO-D-15-0105.1

408 Zhao, Z., Wang, J., Menemenlis, D., Fu, L.-L., Chen, S., & Qiu, B. (2019). De-  
409 composition of the multimodal multidirectional  $m_2$  internal tide field. *Journal*  
410 *of Atmospheric and Oceanic Technology*, 36(6), 1157 - 1173. Retrieved from  
411 <https://journals.ametsoc.org/view/journals/atot/36/6/jtech-d-19-0022.1.xml>  
412 doi: 10.1175/JTECH-D-19-0022.1
